# Supplementary material for: Synthesis of indeno-[1,2-b]-quinoline-9,11(6H,10H)-dione and 7,7-dimethyl-10-aryl-7,8-dihydro-5H-indeno[1,2-b]quinoline-9,11(6H,10H)-dione derivatives in presence of heterogeneous Cu/zeolite-Y as a catalyst
Source: Royal Society of Chemistry journal article supplement (doi:10.1039/d1ra06637d), 2022-01-01
Supplement: d1ra06637d1.pdf [file d1ra06637d1.pdf]

# **Synthesis of Indeno-[1,2-b]-quinoline-9,11(6H,10H)-dione and 7,7-Dimethyl-10-aryl-7,8-dihydro-5H-indeno[1,2-b]quinoline-9,11(6H,10H)-dione derivatives in presence of heterogeneous Cu/Zeolite-Y as a catalyst**

Shankar D. Dhengale<sup>a</sup>, Chandrashekhar V. Rode<sup>b</sup>, Govind B. Kolekar<sup>c</sup>, Prashant V. Anbhule<sup>a</sup>

<sup>a</sup>Medicinal Chemistry Research Laboratory, Department of Chemistry, Shivaji University, Kolhapur-416004, India

<sup>b</sup>Chemical Engineering and Process Development Division, CSIR-National Chemical Laboratory, Dr. Homi Bhabha Road, Pune-411008, India

<sup>c</sup>Fluorescence Spectroscopy Research Laboratory, Department of Chemistry,  
Shivaji University, Kolhapur-416004, MS, India

Email: [pvanbhule@gmail.com](mailto:pvanbhule@gmail.com)

## **Index:**

### **Materials and Methods**

**General procedure for the synthesis of 5H-Indeno[1,2-b]quinoline-9, 11(6H, 10H)-dione derivatives by Cu/Zeolite-Y as the heterogeneous catalyst**

**General procedure for the synthesis of 7,7-dimethyl-10-aryl-7,8-dihydro-5H-indeno[1,2-b]quinoline-9,11(6H,10H)-dione derivatives by Cu/Zeolite-Y as the heterogeneous catalyst**

**Spectral data of 5H-Indeno[1,2-b]quinoline-9, 11(6H, 10H)-dione derivatives**

**Spectral data of 7,7-dimethyl-10-aryl-7,8-dihydro-5H-indeno[1,2-b]quinoline-9,11(6H,10H)-dione derivatives**

**A plausible mechanism for the synthesis 5H-Indeno[1,2-b]quinoline-9, 11(6H, 10H)-dione derivatives**

**A plausible mechanism for the synthesis 7,7-dimethyl-10-aryl-7,8-dihydro-5H-indeno[1,2-b]quinoline-9,11(6H,10H)-dione derivatives**

**Copies of FT-IR,  $^1\text{H}$  NMR,  $^{13}\text{C}$  NMR, and, Mass spectra.**

**Table S1 Comparison of the catalytic efficiency of Cu/zeolite-Y with previously reported catalysts for the synthesis of indenoquinoline derivatives via multi-component reactions**

## **Material methods**

All chemicals were purchased and used further purification, unless otherwise noted. All products were characterized by FT-IR,  $^1\text{H}$  NMR,  $^{13}\text{C}$  NMR spectra and mass spectrometry.

X-ray diffraction (XRD) patterns of the prepared catalysts were retrieved using PANanalytical X'pert Pro dual goniometer diffractometer working under 40 kV and 30 mA with Cu K $\alpha$  radiation in  $2\theta$  range of 10-90°. Collection of the data was carried out using a flat holder in Bragg–Brentano geometry with 1 slit at the source and receiving sides each. An X'celerator solid-state detector was employed with a scan speed of 0.02°min $^{-1}$ .

X-Ray photoelectron spectroscopy (XPS) data were collected on a VG Scientific ESCA-3000 spectrometer using a non-monochromatised Mg K $\alpha$  radiation (1253.6 eV) at a pressure of about  $1 \times 10^{-9}$  Torr (pass energy of 50 eV, electron takeoff angle 55) and overall resolution  $\sim 0.7$  eV determined from the full width at half maximum of the 4f $_{7/2}$  core level of the gold surface. The error in the binding energy values was within 0.1 eV. The binding energy values were charge-corrected to the C1s signal (285.0 eV).

HR-TEM images of the catalyst were obtained using transmission electron microscope model, JEOL 1200 EX. For the analysis, a small amount of the solid sample was sonicated in 2-propanol for 10-15 min. A drop of the formed suspension was deposited on a Cu grid, coated with a carbon layer and the grid was then dried at room temperature before analysis. Morphology of catalysts was studied by scanning electron microscopy (SEM) as well as EDX analysis was performed on LEO–LEICA STEREOSCAN 440 for the presence of Cu loading. Surface area and BJH pore size distribution was calculated in Quantachrome NovaWin ©1994-2012, Quantachrome Instruments v11.02.

### **General procedure for the synthesis of 5H-Indeno[1,2-b]quinoline-9, 11(6H, 10H)-dione derivatives by Cu/Zelite-Y as the heterogeneous catalyst**

A solution of an aromatic aldehyde (1 mmol), dimedone (1 mmol), 1,3-indandione (1 mmol), aniline derivative (1 mmol), and Cu/Zelite-Y (0.012 g) was stirred in ethanol (5 ml) under refluxing conditions for an appropriate time. After completion of the reaction, which was monitored by TLC (Petroleum ether: Ethyl acetate), the catalyst was filtered off, and the solvent was evaporated under reduced pressure. The resulting crude product was purified by recrystallization by methanol.

### **General procedure for the synthesis of 7,7-dimethyl-10-aryl-7,8-dihydro-5H-indeno[1,2-b]quinoline-9,11(6H,10H)-diones derivatives by Cu/Zelite-Y as the heterogeneous catalyst**

A solution of an aromatic aldehyde (1 mmol), dimedone (1 mmol), 1, 3-indandione (1 mmol), ammonium acetate (1 mmol), and Cu/Zelite-Y (0.012 g) was stirred in ethanol (5 ml) under refluxing conditions for an appropriate time. After completion of the reaction, which was monitored by TLC (Petroleum ether: Ethyl acetate), the catalyst was filtered off, and the solvent was evaporated under reduced pressure. The resulting crude product was purified by recrystallization by methanol.

#### **Spectral data of representative compound:**

##### **7,7-dimethyl-10-(3-nitrophenyl)-5-(p-tolyl)-7,8-dihydro-5H-indeno[1,2-b]quinoline-9,11(6H,10H)-dione (5a).**

Red Solid, M.P.: 242-244 °C [242-244 °C]; FT-IR (KBr,  $\nu$ ): 3738, 2952, 1685, 1635, 1592, 1511, 1456, 1351, 1223, 1180, 1101, 1055, 1013, 977, 940, 887, 829, 754, 692, 626  $\text{cm}^{-1}$ ;  $^1\text{H}$  NMR (DMSO- $d_6$ , 400 MHz): 0.80 (s, 3H, -CH<sub>3</sub>) , 0.94 (s, 3H, -CH<sub>3</sub>), 2.01-2.08 (q, 2H, -CH<sub>2</sub>), 2.25-2.42 (dd, 2H, -CH<sub>2</sub>), 2.5 (s, 3H, -CH<sub>3</sub>), 4.98 (s, 1H, -CH), 7.01-7.05 (t, 1H, ArH), 7.18-7.24 (m, 3H, ArH), 7.50-7.58 (m, 4H, ArH), 7.65-7.67 (dd, 2H, ArH), 8.13-8.15 (dd, 2H, ArH);  $^{13}\text{C}$  NMR (DMSO- $d_6$ , 100 MHz): 20.9, 26.1, 29.1, 31.8, 33.8, 49.3, 110.2, 113.7, 120.9, 123.3, 129.1, 129.9, 131.9, 132.7, 135.3, 136.5, 140.2, 145.9, 151.8, 152.8, 154.8, 190.7, 195.3 ppm

##### **10-(4-chlorophenyl)-7,7-dimethyl-5-(p-tolyl)-7,8-dihydro-5H-indeno[1,2-b]quinoline-9,11(6H,10H)-dione (5b).**

Red Solid, M.P.: 293-294 °C [291-293 °C]; FT-IR (KBr,  $\nu$ ): 3741, 2932, 1682, 1630, 1558, 1512, 1392, 1361, 1252, 1221, 1167, 1098, 1013, 974, 935, 885, 840, 760, 733, 696, 637, 587  $\text{cm}^{-1}$ ;  $^1\text{H}$  NMR (DMSO- $d_6$ , 300 MHz): 0.89 (s, 3H, -CH<sub>3</sub>) , 1.00 (s, 3H, -CH<sub>3</sub>), 2.03-2.07 (q, 2H, -CH<sub>2</sub>), 2.15-2.27 (q, 2H, -CH<sub>2</sub>), 2.56 (s, 3H, -CH<sub>3</sub>), 5.07 (s, 1H, -CH), 6.85-6.89 (t, 1H, ArH), 7.05-7.09 (m,

3H, ArH), 7.21-7.26 (m, 4H, ArH), 7.28-7.36 (dd, 2H, ArH), 7.37-7.41 (dd, 2H, ArH);  $^{13}\text{C}$  NMR (DMSO- $d_6$ , 100 MHz): 21.5, 26.8, 29.7, 32.3, 33.2, 41.0, 50.1, 112.5, 115.5, 120.7, 121.3, 128.4, 129.3, 131.4, 132.0, 135.9, 137.2, 140.6, 144.0, 150.8, 154.4, 191.9, 196.0 ppm

GC-MS:  $m/z$  = 479 (M-H)

**7,7-dimethyl-10-(4-nitrophenyl)-5-(p-tolyl)-7,8-dihydro-5H-indeno[1,2-b]quinoline-9,11(6H,10H)-dione (5c).**

Red Solid, M.P.: 290-292 °C [290-292 °C]; FT-IR (KBr,  $\nu$ ): 3740, 2950, 1702, 1633, 1522, 1460, 1352, 1254, 1178, 1098, 1054, 1014, 942, 887, 828, 754, 707, 626  $\text{cm}^{-1}$ ;  $^1\text{H}$  NMR (DMSO- $d_6$ , 400 MHz): 0.80 (s, 3H, -CH $_3$ ), 0.94 (s, 3H, -CH $_3$ ), 2.00-2.07 (q, 2H, -CH $_2$ ), 2.25-2.42 (dd, 2H, -CH $_2$ ), 2.5 (s, 3H, -CH $_3$ ), 4.98 (s, 1H, -CH), 7.01-7.05 (t, 1H, ArH), 7.18-7.24 (m, 3H, ArH), 7.50 (m, 3H, ArH), 7.55 (m, 1H, ArH), 7.65-7.67 (dd, 2H, ArH), 8.13-8.15 (dd, 2H, ArH);  $^{13}\text{C}$  NMR (DMSO- $d_6$ , 100 MHz): 20.9, 26.1, 29.1, 31.8, 33.8, 49.3, 110.2, 113.7, 120.9, 123.4, 129.1, 129.9, 131.9, 132.7, 135.3, 136.5, 140.2, 145.9, 151.8, 152.8, 154.8, 190.7, 195.3 ppm; GC-MS:  $m/z$  = 490 (M-H)

**10-(4-methoxyphenyl)-7,7-dimethyl-5-(p-tolyl)-7,8-dihydro-5H-indeno[1,2-b]quinoline-9,11(6H,10H)-dione (5d).**

Red Solid, M.P.: 248-250 °C [250-251 °C]; FT-IR (KBr,  $\nu$ ): 3741, 2954, 2928, 1686, 1642, 1557, 1506, 1455, 1392, 1362, 1252, 1167, 1096, 1032, 973, 931, 885, 830, 759, 704  $\text{cm}^{-1}$ ;  $^1\text{H}$  NMR (DMSO- $d_6$ , 400 MHz): 0.80 (s, 3H, -CH $_3$ ), 0.93 (s, 3H, -CH $_3$ ), 1.96-2.05 (q, 2H, -CH $_2$ ), 2.23-2.42 (dd, 2H, -CH $_2$ ), 2.5 (s, 3H, -CH $_3$ ), 3.7 (s, 3H, -OCH $_3$ ), 4.80 (s, 1H, -CH), 6.80-6.84 (dd, 2H, ArH), 6.98-7.02 (t, 2H, ArH), 7.15-7.20 (m, 2H, ArH), 7.22-7.28 (m, 2H, ArH), 7.46-7.48 (dd, 2H, ArH), 7.53-7.55 (dd, 2H, ArH);  $^{13}\text{C}$  NMR (DMSO- $d_6$ , 100 MHz): 20.9, 25.9, 29.3, 31.7, 32.2, 49.5, 54.9, 111.8, 113.5, 114.8, 120.5, 120.7, 128.6, 129.6, 131.7, 132.9, 135.5, 136.8, 137.9, 140.0, 150.6, 154.1, 157.6, 191.0, 195.3 ppm

**10-(4-bromophenyl)-7,7-dimethyl-5-(p-tolyl)-7,8-dihydro-5H-indeno[1,2-b]quinoline-9,11(6H,10H)-dione (5e).**

Red Solid, M.P.: 228-229 °C [229-230 °C]; FT-IR (KBr,  $\nu$ ): 3742, 2956, 2932, 1690, 1640, 1575, 1556, 1512, 1434, 1393, 1363, 1253, 1220, 1189, 1098, 1054, 1012, 972, 933, 886, 839, 788, 761, 726, 694, 679, 636, 584  $\text{cm}^{-1}$ ;  $^1\text{H}$  NMR (DMSO- $d_6$ , 400 MHz): 0.80 (s, 3H, -CH $_3$ ), 0.93 (s, 3H, -CH $_3$ ), 1.97-2.07 (q, 2H, -CH $_2$ ), 2.24-2.41 (dd, 2H, -CH $_2$ ), 2.5 (s, 3H, -CH $_3$ ), 4.83 (s, 1H, -CH), 7.00-7.04 (t, 1H, ArH), 7.17-7.24 (m, 4H, ArH), 7.31-7.34 (dd, 3H, ArH), 7.43-7.49 (m, 4H, ArH);  $^{13}\text{C}$  NMR (DMSO- $d_6$ , 100 MHz): 20.8,

26.0, 29.2, 31.8, 32.9, 49.3, 110.9, 114.2, 119.2, 120.7, 120.8 129.8, 130.0, 130.9, 131.8, 132.8, 135.3, 136.7, 140.1, 144.9, 151.2, 154.5, 195.3 ppm

**10-(4-Fluorophenyl)-7,8-dihydro-7,7-dimethyl-5-(p-tolyl)-5H-indeno[1,2-b]quinoline-9,11-(6H,10H)-dione (5f).**

Red Solid, M.P.: 224-226 °C [225-227 °C]; <sup>1</sup>H NMR (DMSO-d<sub>6</sub>, 400 MHz): 0.89 (s, 3H, -CH<sub>3</sub>), 1.0 (s, 3H, -CH<sub>3</sub>), 2.03-2.07 (q, 2H, -CH<sub>2</sub>), 2.15-2.28 (m, 2H, -CH<sub>2</sub>), 2.5 (s, 3H, -CH<sub>3</sub>), 5.1 (s, 1H, -CH), 6.85-6.97 (m, 1H, ArH), 7.07-7.11 (m, 2H, ArH), 7.26-7.31 (m, 2H, ArH), 7.31-7.39 (m, 3H, ArH), 7.39-7.42 (m, 4H, ArH); <sup>13</sup>C NMR (DMSO-d<sub>6</sub>, 100 MHz): 21.5, 26.8, 29.7, 32.2, 32.9, 41.0, 50.1, 112.9, 114.9, 115.1, 115.8, 120.7, 121.3, 129.3, 129.4, 131.3, 133.5, 136.0, 137.2, 140.5, 141.2, 141.3, 150.6, 154.2, 162.6, 192.0, 196.0 ppm

**10-(3,4-dihydroxyphenyl)-7,7-dimethyl-5-(p-tolyl)-7,8-dihydro-5H-indeno[1,2-b]quinoline-9,11(6H,10H)-dione(5g)**

Red Solid, M.P.: 283-284 °C [-]; <sup>1</sup>H NMR (DMSO-d<sub>6</sub>, 400 MHz): 0.78 (s, 3H, -CH<sub>3</sub>), 0.90 (d, 3H, -CH<sub>3</sub>), 1.91-2.21 (m, 4H, 2-CH<sub>2</sub>), 2.45-2.47 (m, 4H, -CH<sub>2</sub>), 2.5 (s, 3H, -CH<sub>3</sub>), 4.71 (s, 1H, -OH), 6.57-6.58 (m, 2H, ArH), 6.78-6.82 (dd, 2H, ArH), 6.97-7.01 (m, 1H, ArH), 7.10-7.12 (m, 1H, ArH), 7.26-7.31 (m, 4H, ArH), 7.66-7.67 (dd, 2H, ArH), 8.0 (s, 1H, -OH), 8.24 (s, 1H, -OH); <sup>13</sup>C NMR (DMSO-d<sub>6</sub>, 100 MHz): 26.2, 31.4, 34.5, 36.9, 37.2, 54.9, 117.7, 120.1, 120.2, 120.6, 123.7, 125.5, 133.9, 135.6, 136.3, 138.2, 140.5, 142.1, 145.2, 148.3, 149.4, 155.2, 159.0, 196.7, 200.8 ppm

**7,7-Dimethyl-10-(4-nitrophenyl)-7,8-dihydro-5H-indeno[1,2-b]quinoline-9,11(6H,10H)-dione (6a)**

Red Solid, M.P.: 215-216 °C [215-217 °C]; FT-IR (KBr, ν): 3740, 3074, 1711, 1610, 1576, 1529, 1347, 1309, 1258, 1172, 1092, 1005, 883, 820, 752, 712, 672, 629 cm<sup>-1</sup>; <sup>1</sup>H NMR (DMSO-d<sub>6</sub>, 400 MHz): 0.86 (s, 3H, -CH<sub>3</sub>), 1.08 (s, 3H, -CH<sub>3</sub>), 1.98-2.46 (m, 2H, -CH<sub>2</sub>), 2.60-2.70 (q, 2H, -CH<sub>2</sub>), 4.88 (s, 1H, -CH), 7.25-7.27 (d, 1H, ArH), 7.33-7.37 (t, 1H, ArH), 7.42-7.50 (m, 1H, ArH), 7.50-7.55 (m, 1H, ArH), 7.59-7.63 (m, 1H, ArH), 7.70-7.72 (m, 1H, ArH), 7.93-8.01 (m, 2H, ArH), 10.57 (s, 1H, -NH); <sup>13</sup>C NMR (DMSO-d<sub>6</sub>, 100 MHz): 26.3, 26.7, 28.6, 29.0, 32.1, 33.4, 34.0, 50.0, 50.1, 108.8, 110.5, 112.2, 119.4, 120.7, 121.0, 121.9, 129.1, 129.5, 130.3, 132.0, 132.7, 134.4, 135.9, 147.5, 148.0, 149.1, 150.0, 151.0, 154.0 ppm; GC-MS: m/z = 400 (M-H)

**7,7-Dimethyl-10-(4-bromophenyl)-7,8-dihydro-5H-indeno[1,2-b]quinoline-9,11(6H,10H)-dione (6b)**

Red Solid, M.P.: 316-318 °C [316-318 °C]; <sup>1</sup>H NMR (DMSO-d<sub>6</sub>, 400 MHz): 0.97 (s, 3H, -CH<sub>3</sub>), 1.04 (s, 3H, -CH<sub>3</sub>), 2.04-2.18 (q, 2H, -CH<sub>2</sub>), 2.7 (m, 2H, -CH<sub>2</sub>), 4.7 (s, 1H, -CH), 7.11-7.28 (m, 6H, ArH), 7.42-7.44 (d, 1H, ArH), 7.77-7.83 (d, 1H, ArH), 10.11 (s, 1H, -NH); <sup>13</sup>C NMR (DMSO-d<sub>6</sub>, 100 MHz): 27.5, 29.1, 32.5, 33.8, 40.8, 50.8, 110.3, 113.5, 119.2, 119.5, 120.8, 130.0, 131.0, 131.7, 133.4, 136.6, 145.4, 150.6, 154.2, 191.8, 195.5 ppm.

**7,7-Dimethyl-10-(4-chlorophenyl)-7,8-dihydro-5H-indeno[1,2-b]quinoline-9,11(6H,10H)-dione (6c)**

Red Solid, M.P.: 310-311 °C [312-313 °C]; <sup>1</sup>H NMR (DMSO-d<sub>6</sub>, 400 MHz): 0.84 (s, 2H, -CH<sub>3</sub>), 1.03 (s, 1H), 1.94-2.10 (m, 2H, -CH<sub>2</sub>), 2.14-2.49 (m, 2H, -CH<sub>2</sub>), 4.72-4.79 (s, 1H, -CH), 7.02-7.18 (m, 7H, ArH), 7.24-7.27 (t, 1H, ArH), 7.41-7.43 (d, 1H, ArH), 10.1 (s, 1H, -NH) ppm; GC-MS: m/z = 389 (M-H)

**7,7-Dimethyl-10-(4-methoxyphenyl)-7,8-dihydro-5H-indeno[1,2-b]quinoline-9,11(6H,10H)-dione (6d)**

Red Solid, M.P.: 301-302 °C [300-301 °C]; GC-MS: m/z = 385 (M-H)

**Plausible reaction mechanism**

For the synthesis of Indeno-[1,2-b]-quinoline-9,11-(6H, 10H)-dione derivatives, we have used heterogeneous Cu/Zelite-Y catalyst which was crucial role for the reaction. It acts as acidic nature. Support zeolite-Y shows Brønsted acidic nature and CuO shows lewis acid in nature. Primarily, reaction of enol form of 1,3-indandione and substituted aromatic aldehyde forms aldol product which on dehydration forms olefinic intermediate (1). In second part, dimedone reacts with p-toluidine forms intermediate (2) or reaction of dimedone with ammonium acetate gives intermediate (3). After that the intermediates (1, 2) or (1, 3) reacts with each other followed by intramolecular dehydration reaction takes place and final product of reaction obtained.

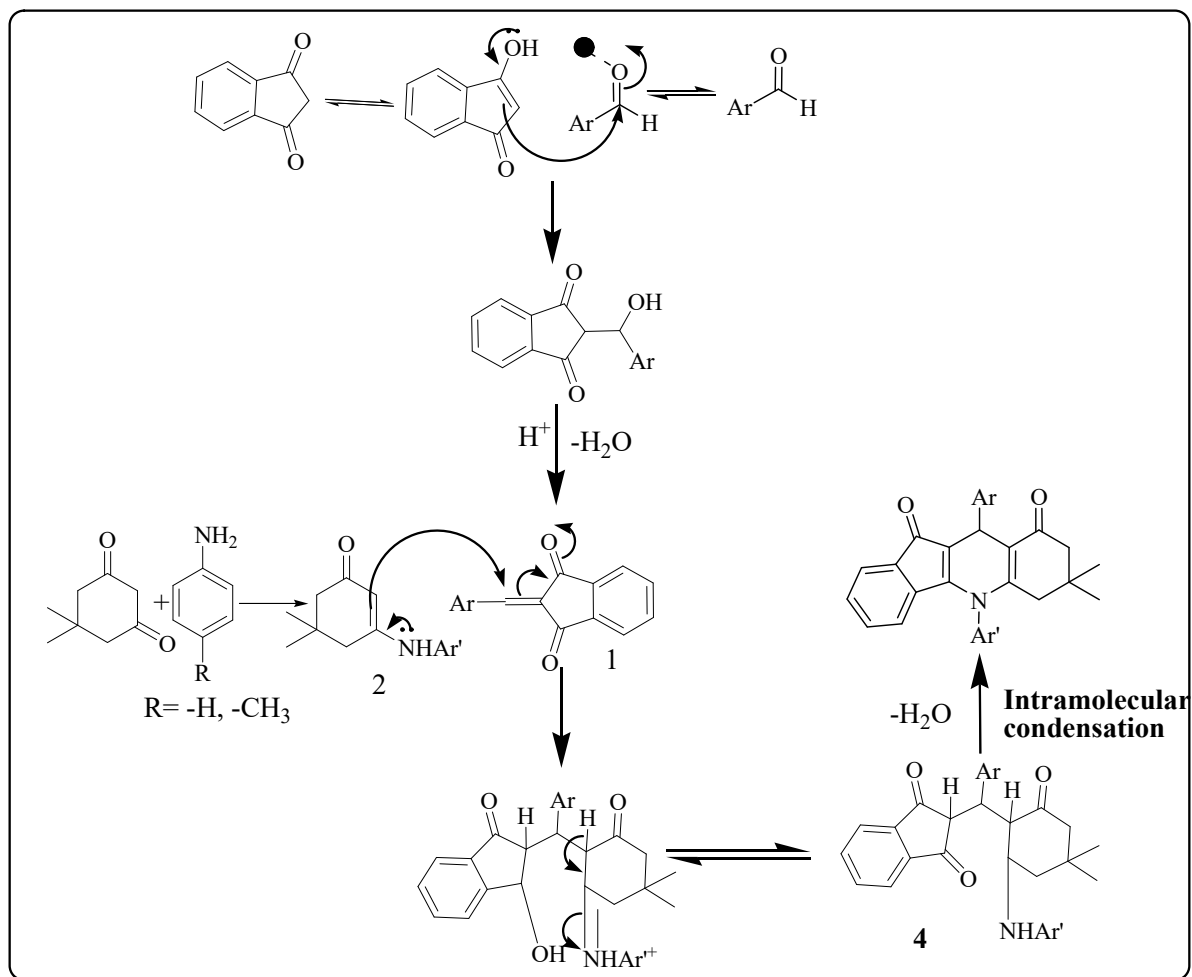

**Scheme 3** Plausible mechanism for the heterogeneous Cu/Zelite-Y catalyzed formation of Indeno-[1,2-b]-quinoline-9,11-(6H, 10H)-dione derivatives

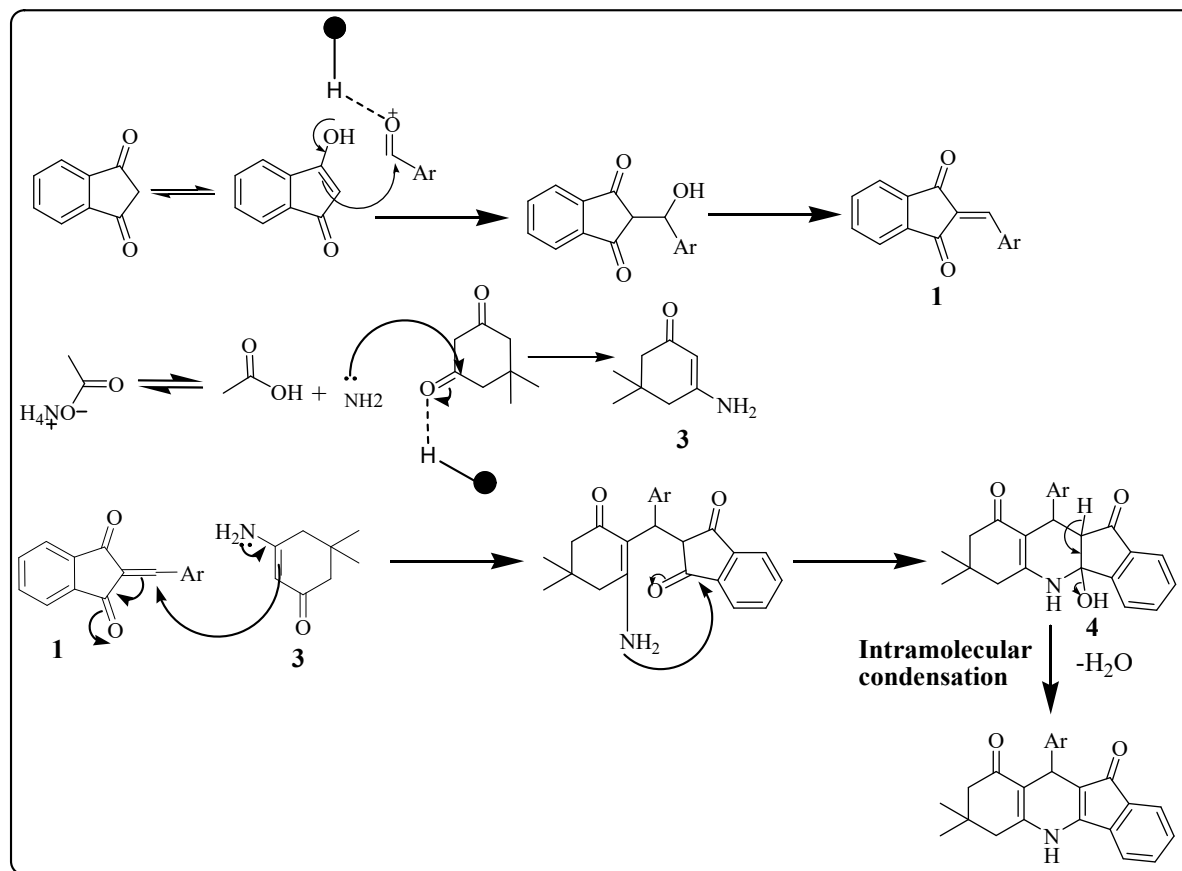

**Scheme 4** Plausible mechanism for the heterogeneous Cu/Zelite-Y catalyzed formation of 7,7-dimethyl-10-aryl-7,8-dihydro-5H-indeno-[1,2-b]-quinoline-9,11(6H,10H)-diones derivatives

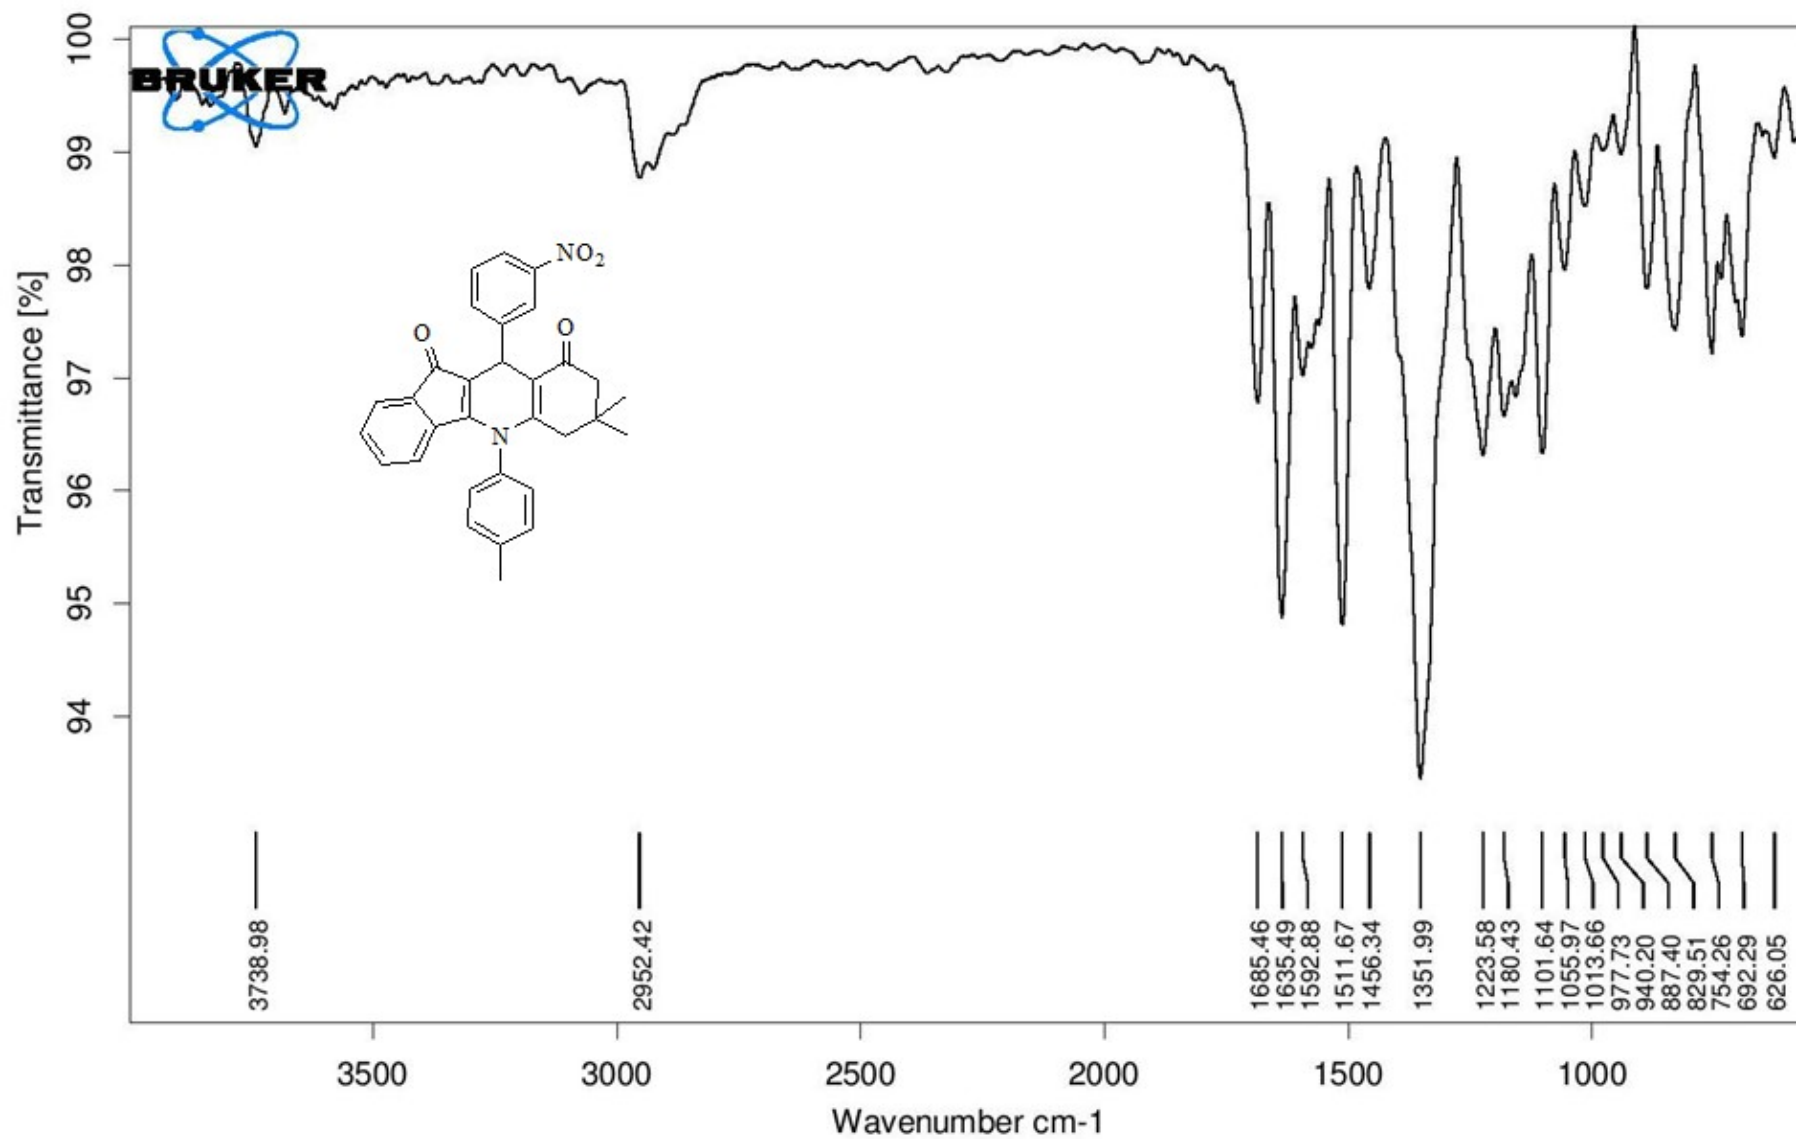

FT-IR (5a)

**R-58**

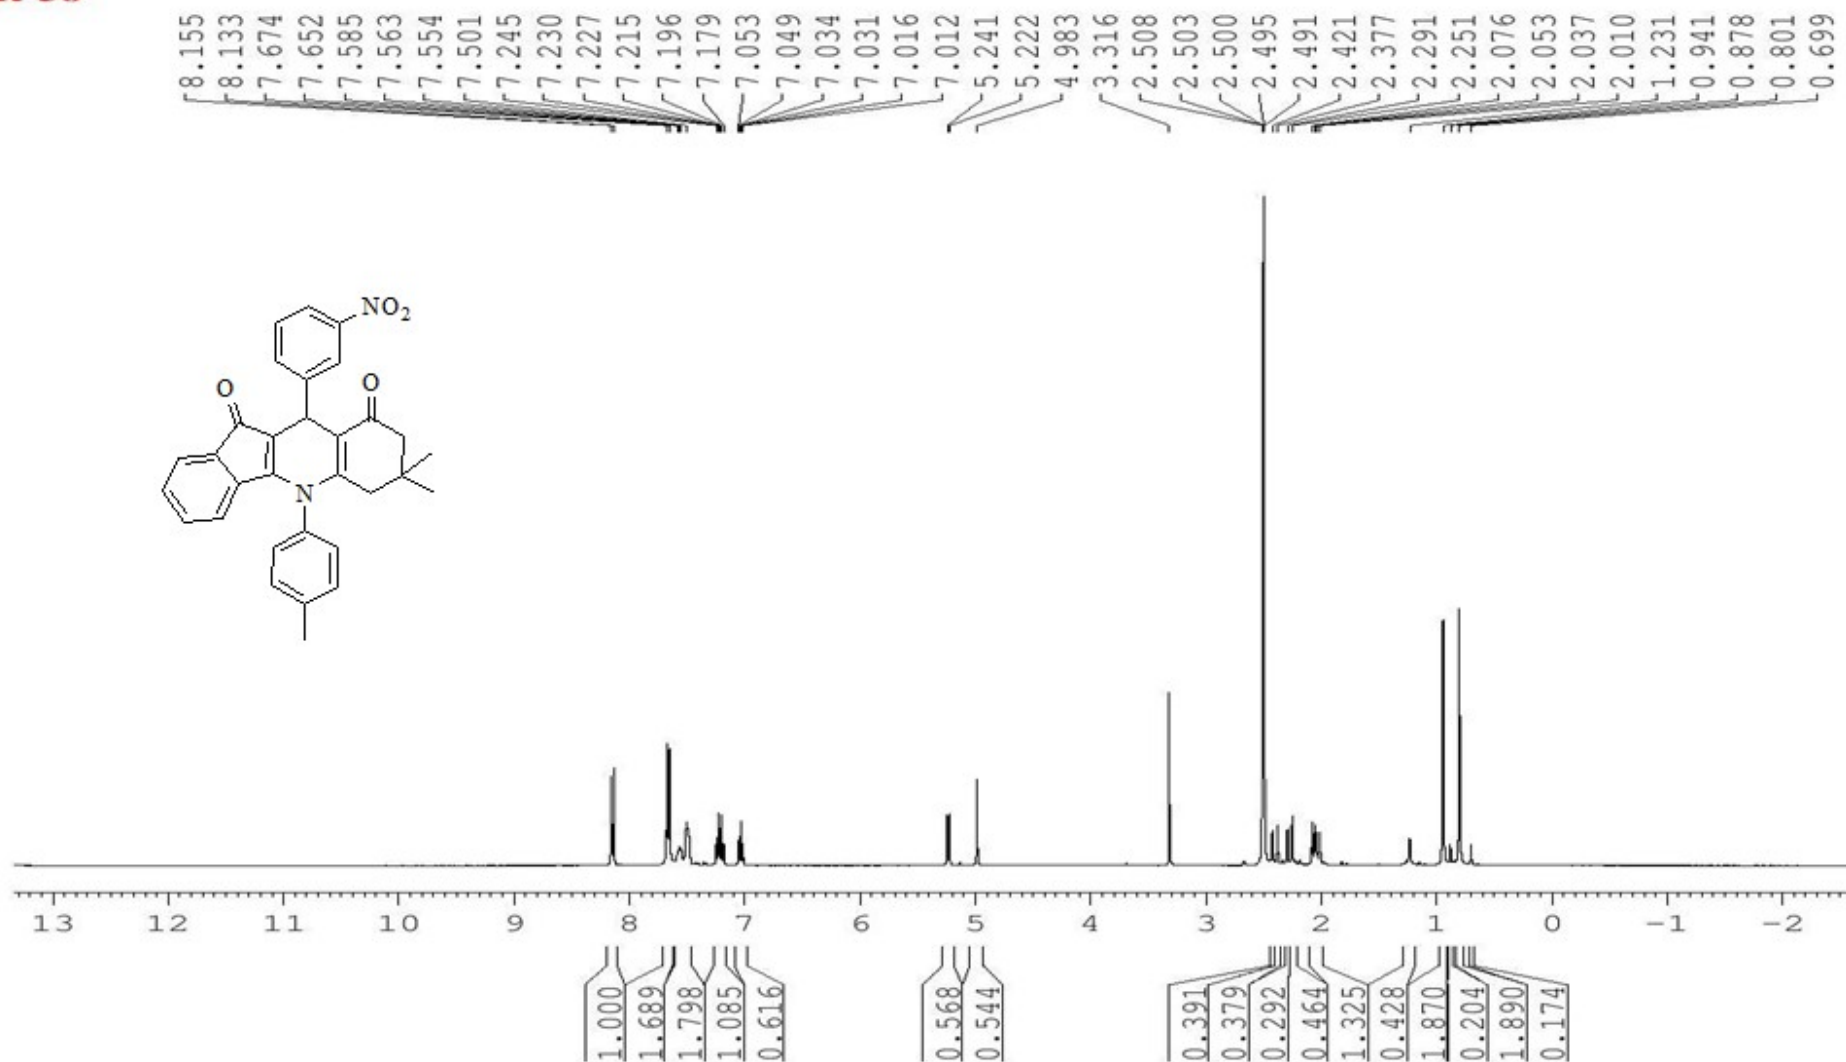

$^1\text{H}$  NMR (5a)

**R-58**

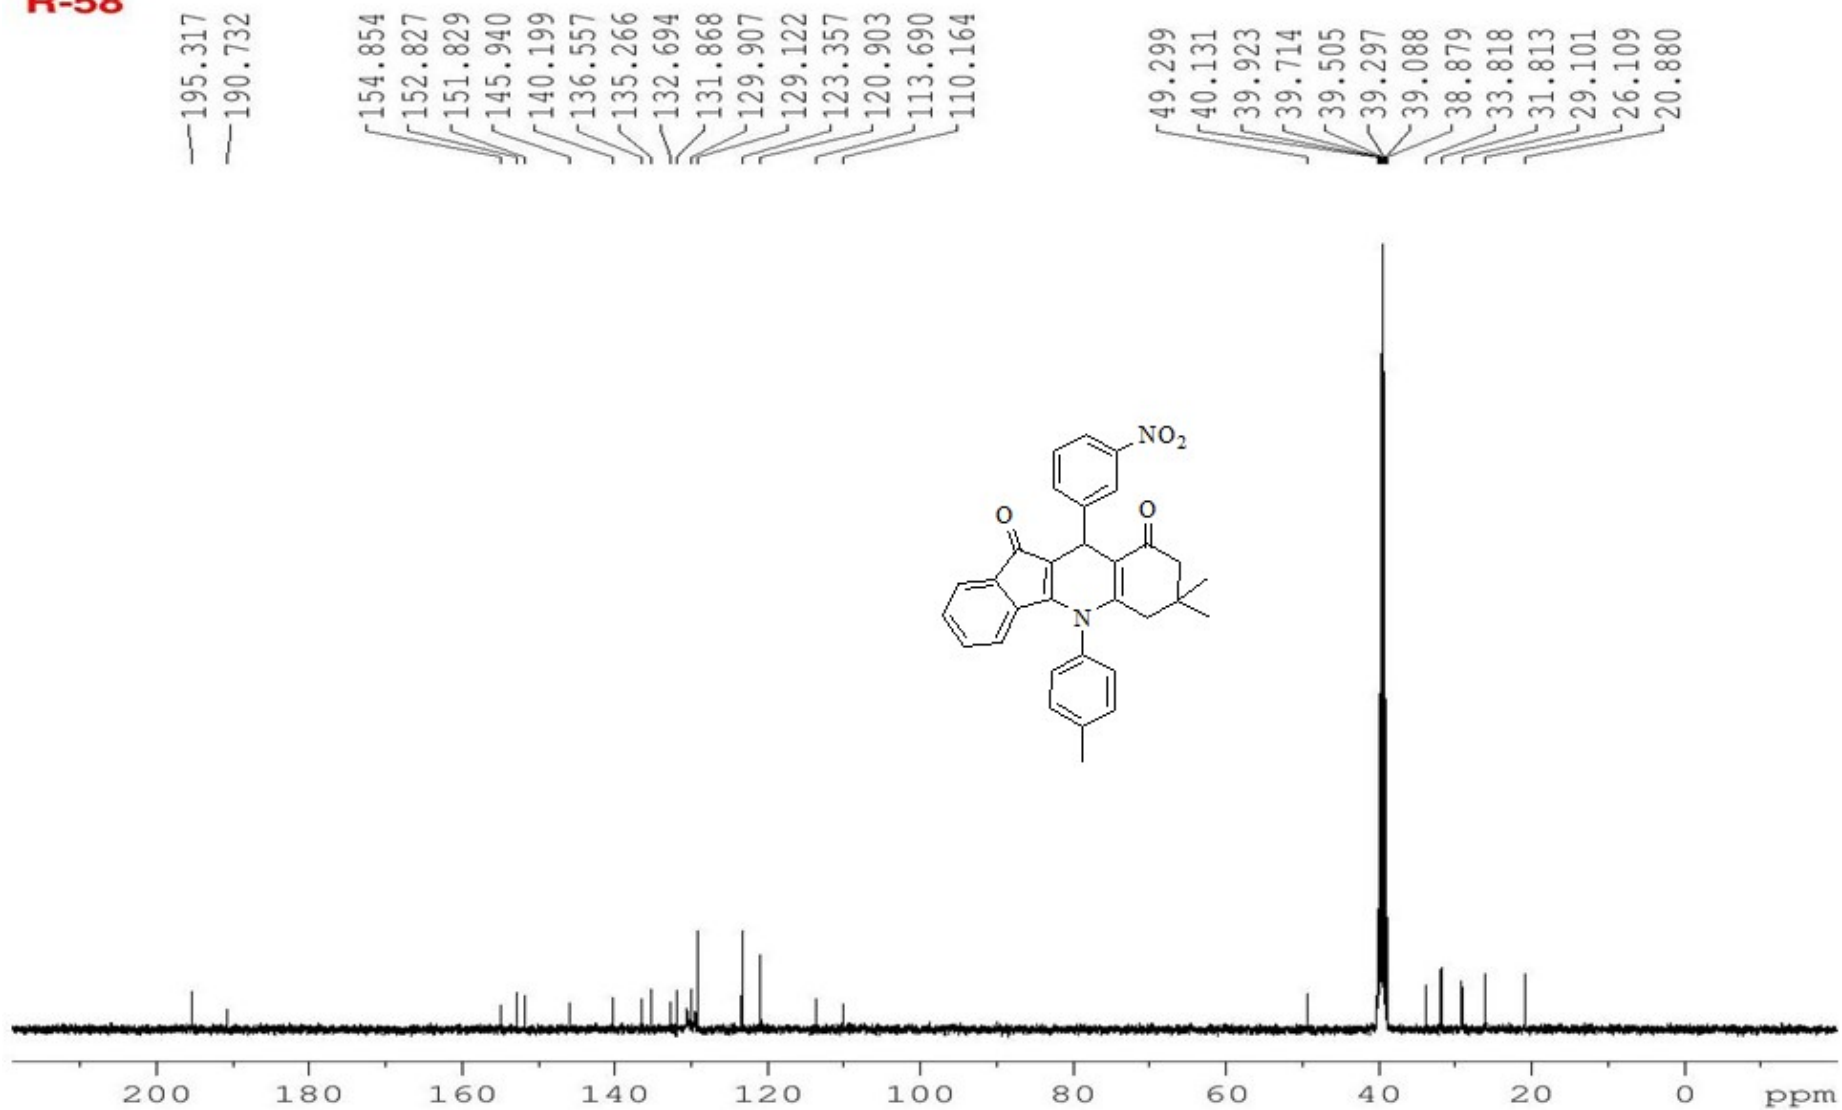

<sup>13</sup>C NMR (5a)

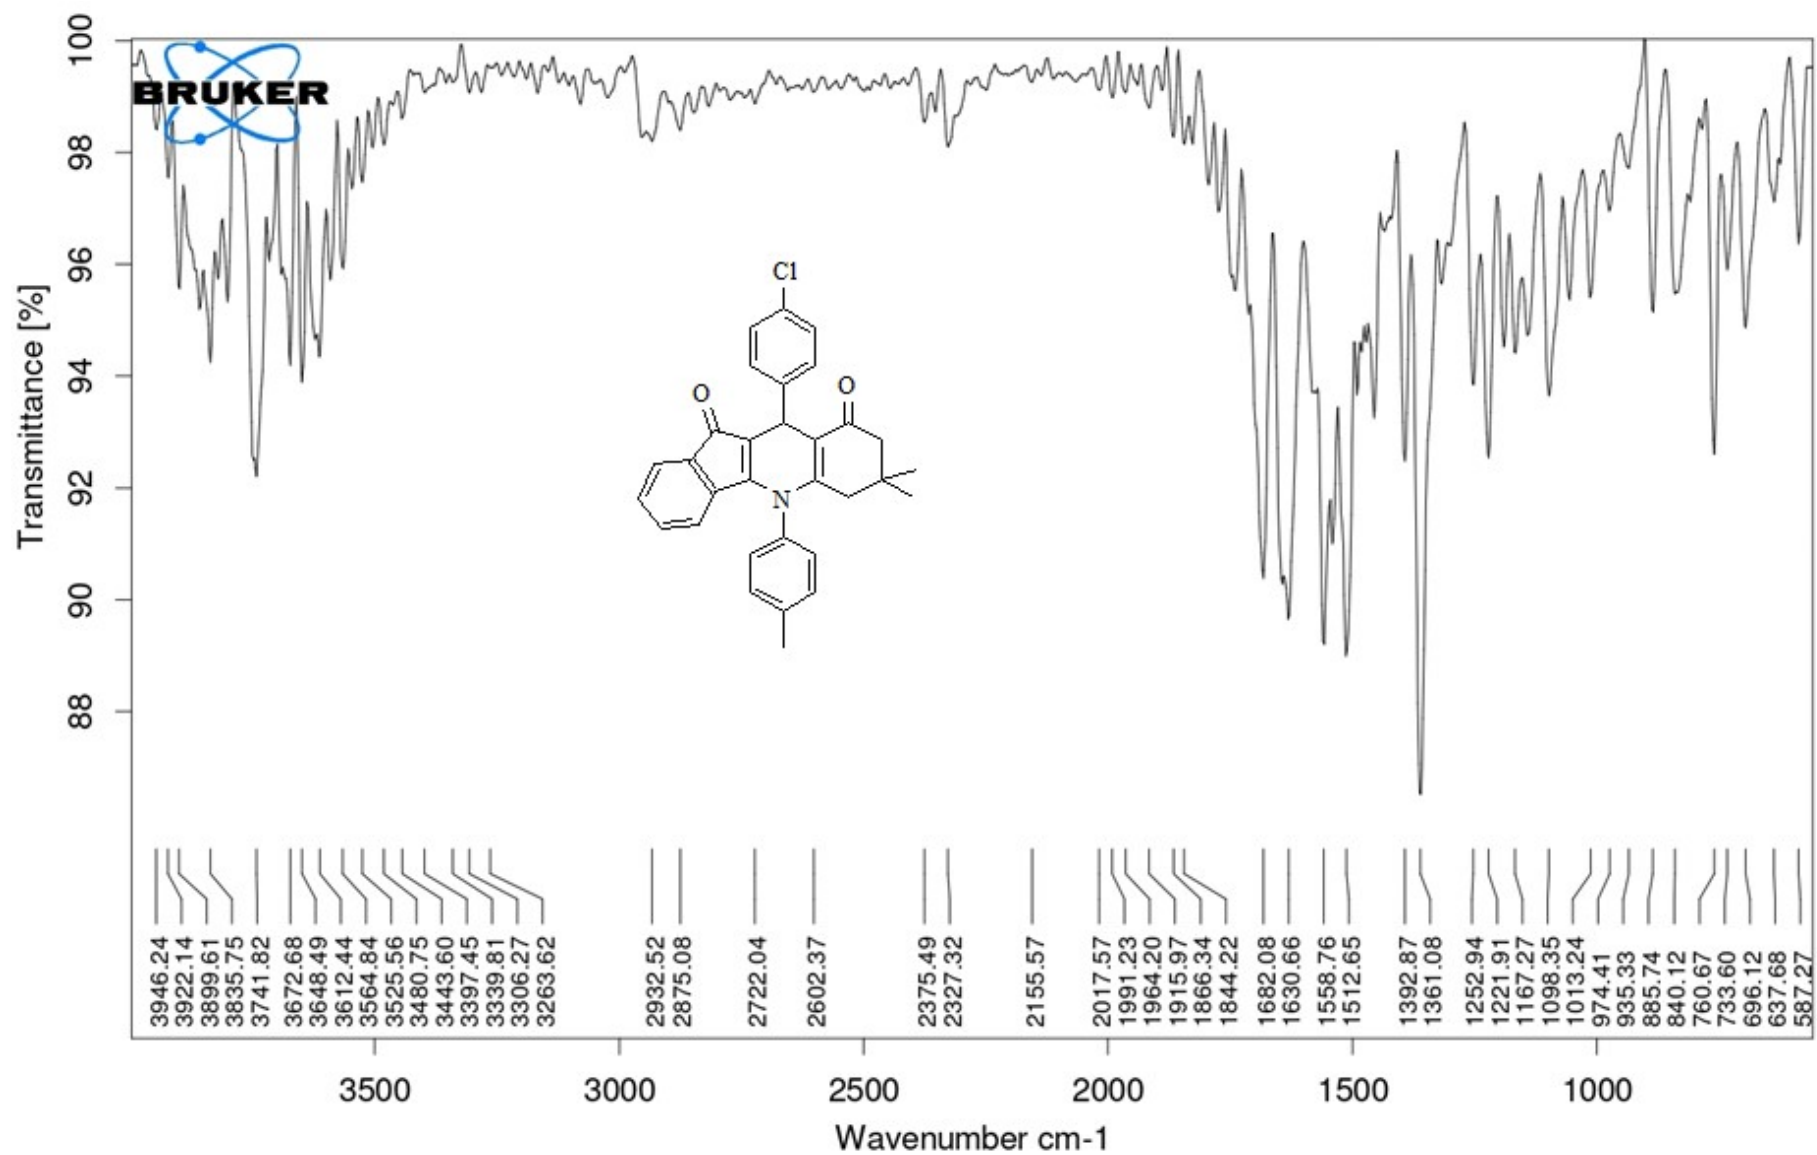

FT-IR (5b)

7.416  
7.396  
7.392  
7.387  
7.375  
7.371  
7.365  
7.322  
7.301  
7.281  
7.280  
7.265  
7.244  
7.238  
7.233  
7.221  
7.217  
7.210  
7.097  
7.096  
7.078  
7.060  
7.058  
6.895  
6.892  
6.876  
6.873  
6.857  
6.854  
5.273  
5.254  
5.075

2.557  
2.271  
2.265  
2.231  
2.221  
2.188  
2.149  
2.146  
2.074  
2.071  
2.030  
2.028  
1.004  
0.894

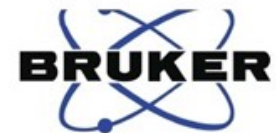

R 59

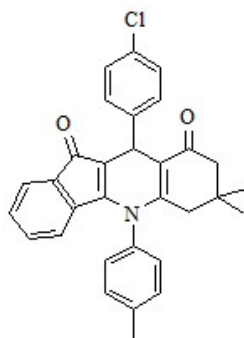

Current Data Parameters  
NAME FAHSUS  
EXPNO 672  
PROCNO 1

F2 - Acquisition Parameters  
Date\_ 20210527  
Time 15.12  
INSTRUM spect  
PROBHD 5 mm BBI 1H/2H  
PULPROG zg30  
TD 65536  
SOLVENT CDCl3  
NS 16  
DS 2  
SWH 8223.685 Hz  
FIDRES 0.125483 Hz  
AQ 3.9845889 sec  
RG 41.52  
DW 60.800 usec  
DE 6.50 usec  
TE 0 K  
D1 1.00000000 sec  
TD0 1

===== CHANNEL f1 =====  
SF01 400.1324710 MHz  
NUC1 1H  
P1 8.00 usec  
PLW1 11.47000027 W

F2 - Processing parameters  
SI 65536  
SF 400.1300000 MHz  
WDW EM  
SSB 0  
LB 0.30 Hz  
GB 0  
PC 1.00

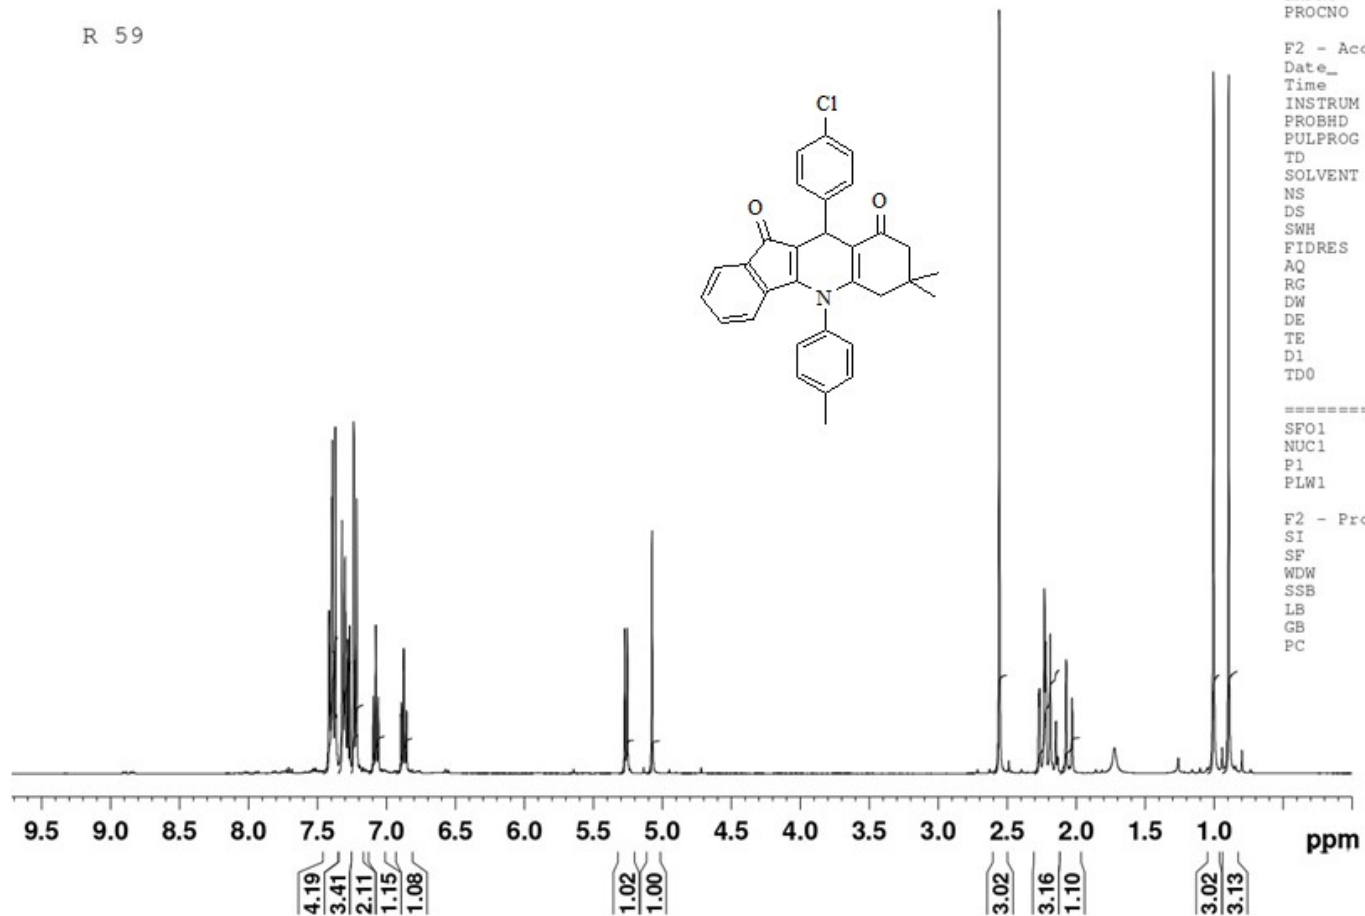

<sup>1</sup>H NMR (5b)

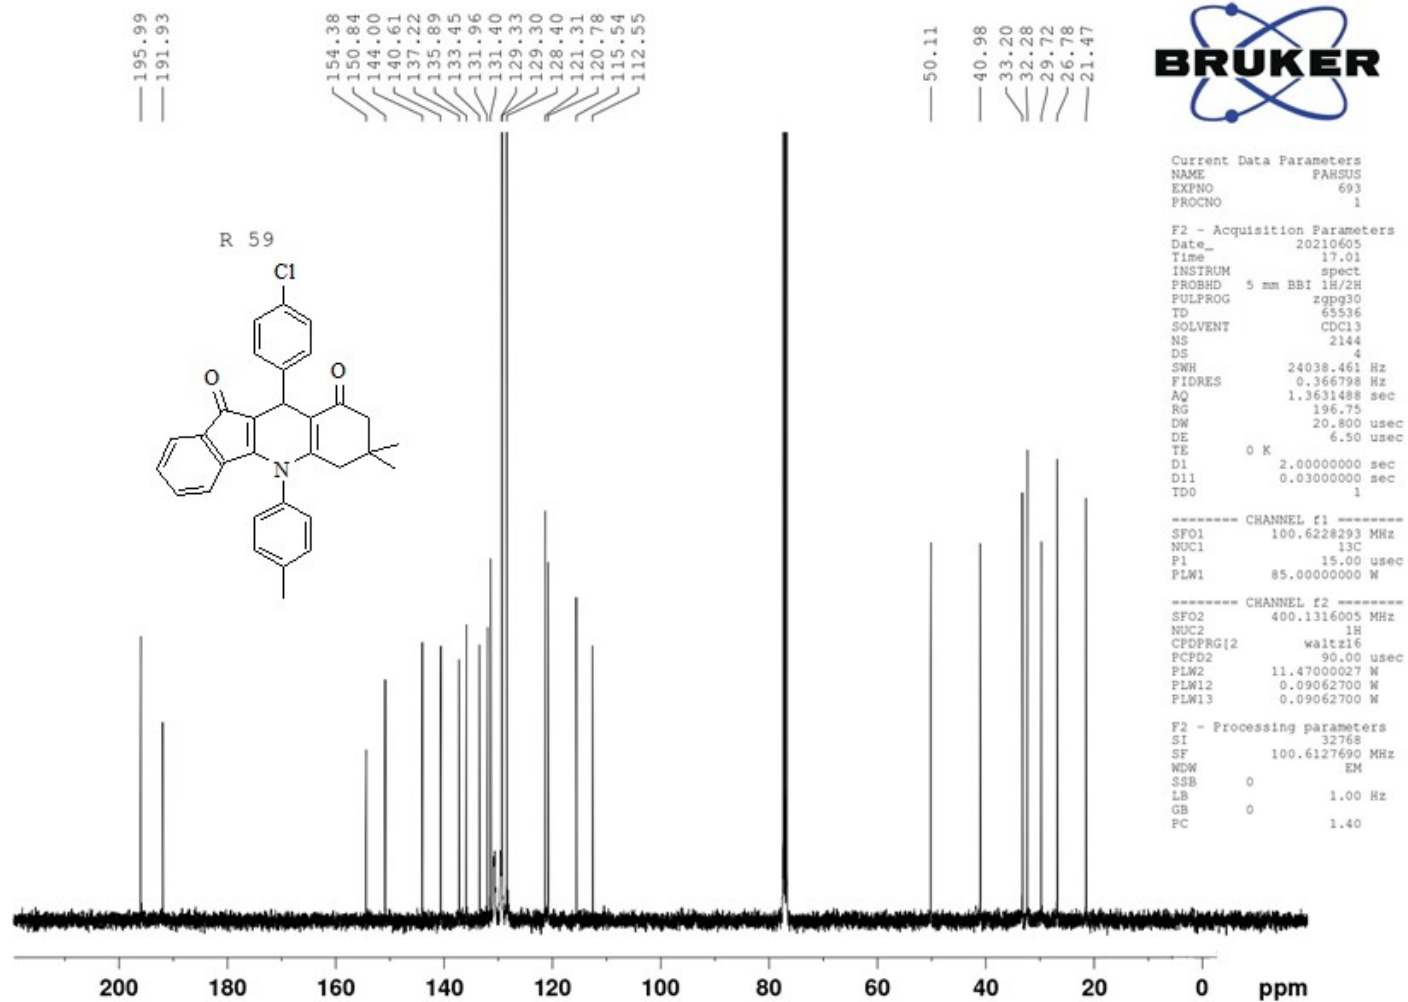

<sup>13</sup>C NMR (5b)

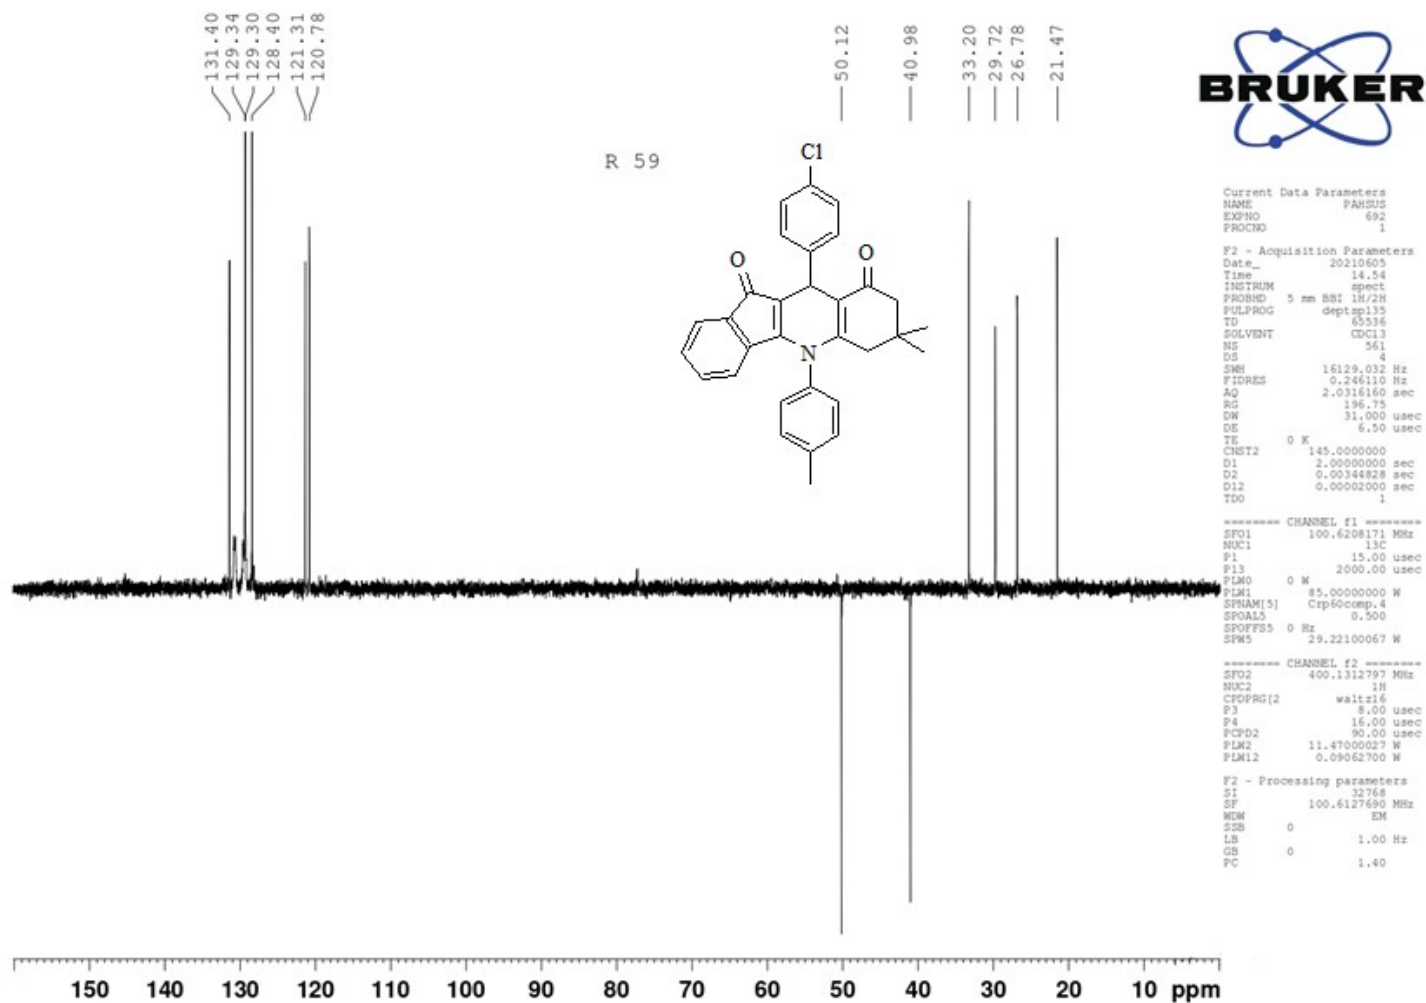

DEPT 13C NMR (5b)

# Spectrum

Line#:1 R.Time:5.7(Scan#:1076)

MassPeaks:388

RawMode:Averaged 5.7-5.7(1075-1077) BasePeak:368(5330558)

BG Mode:Calc. from Peak Group 1 - Event 1

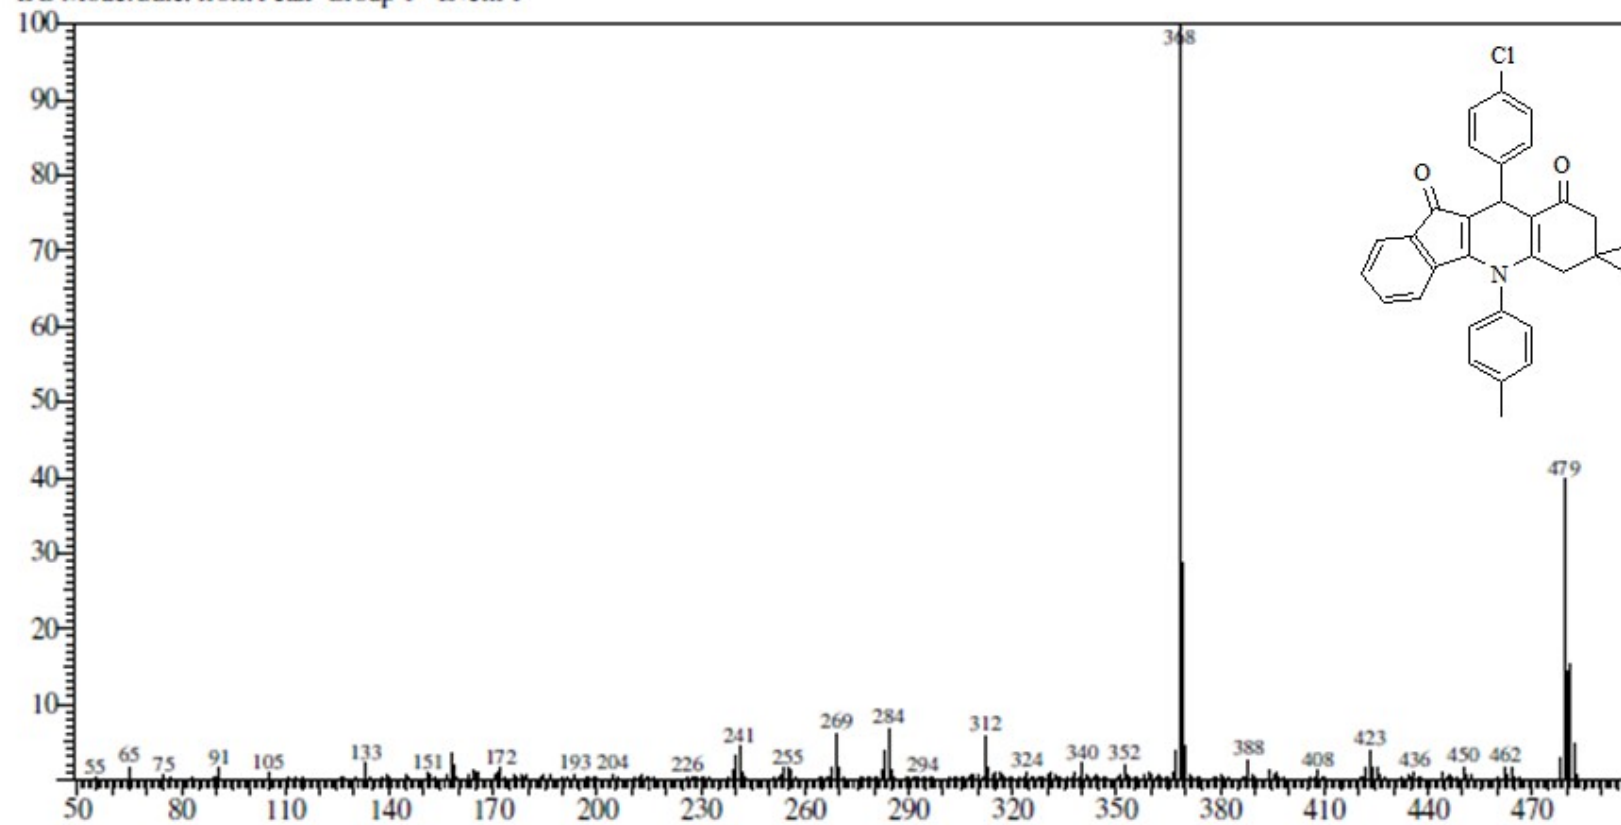

GC-MS MS (5b)

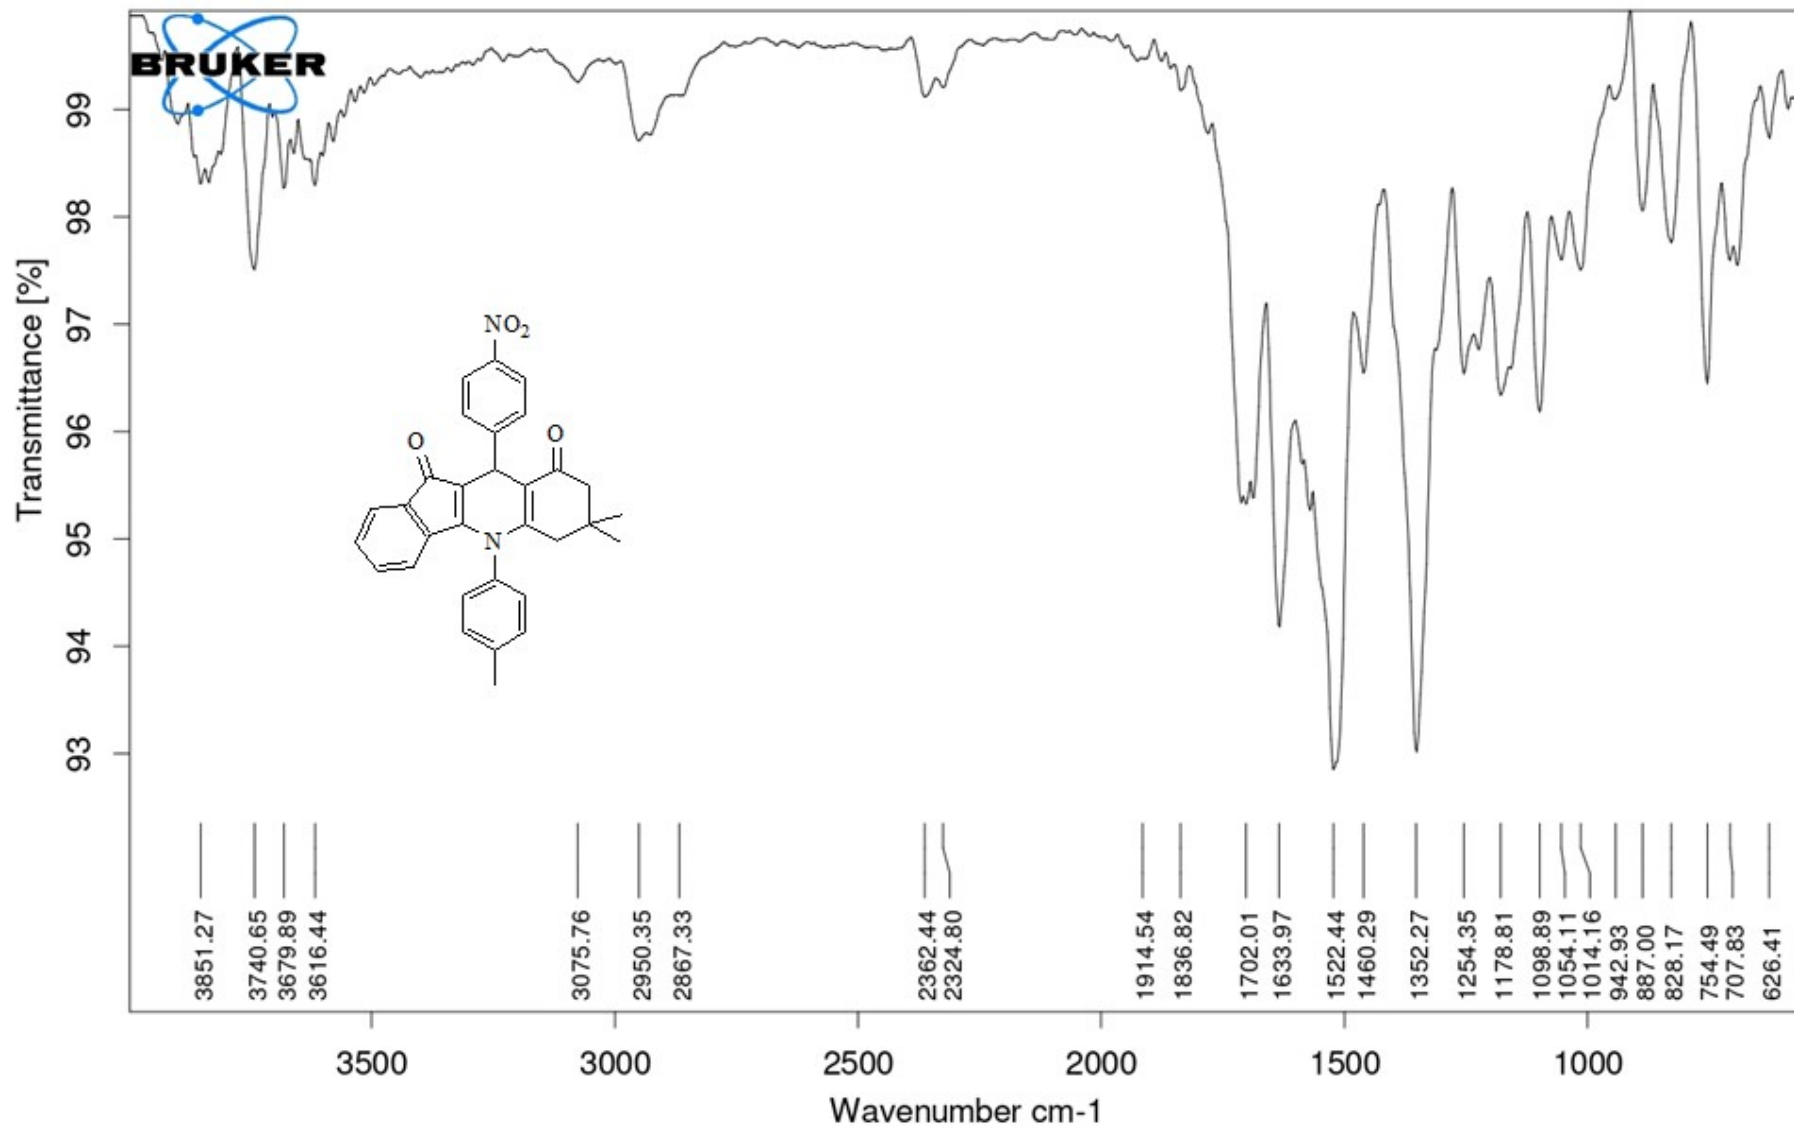

FT-IR (5c)

**R-61**

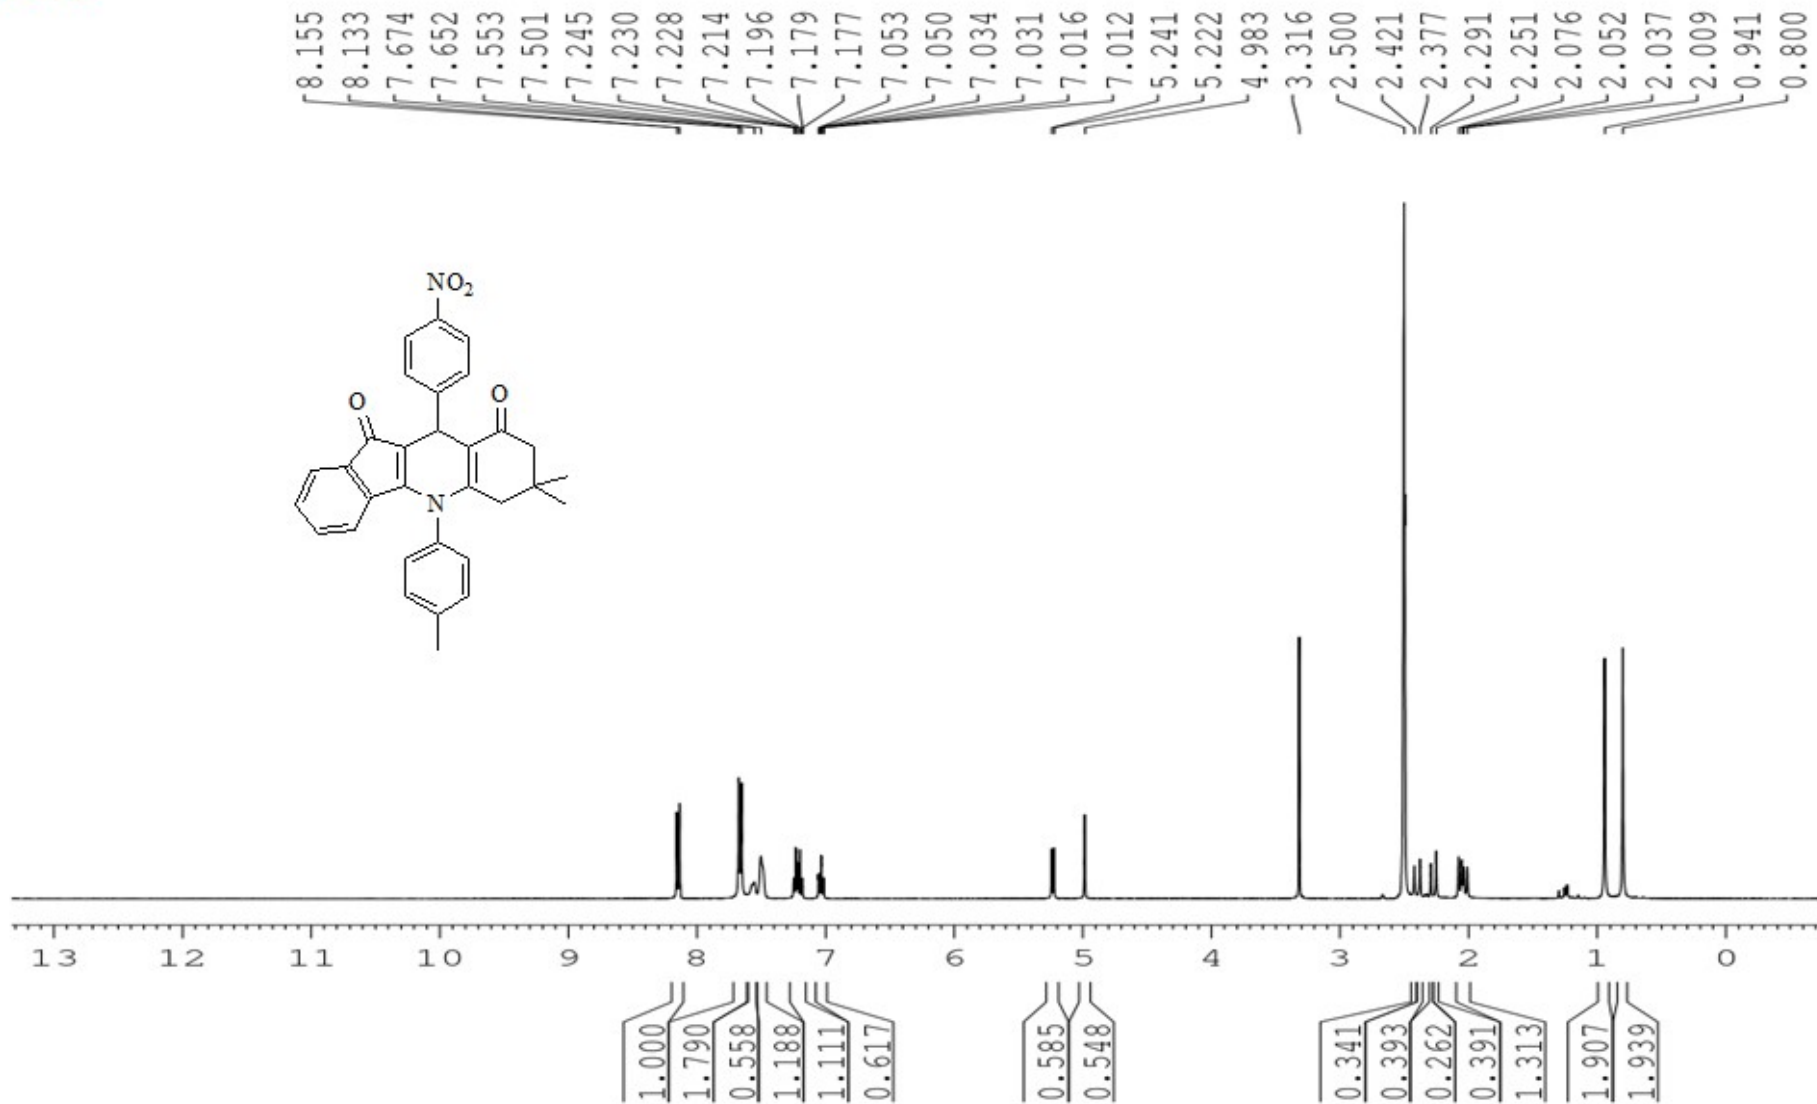

<sup>1</sup>H NMR (5c)

**R-61**

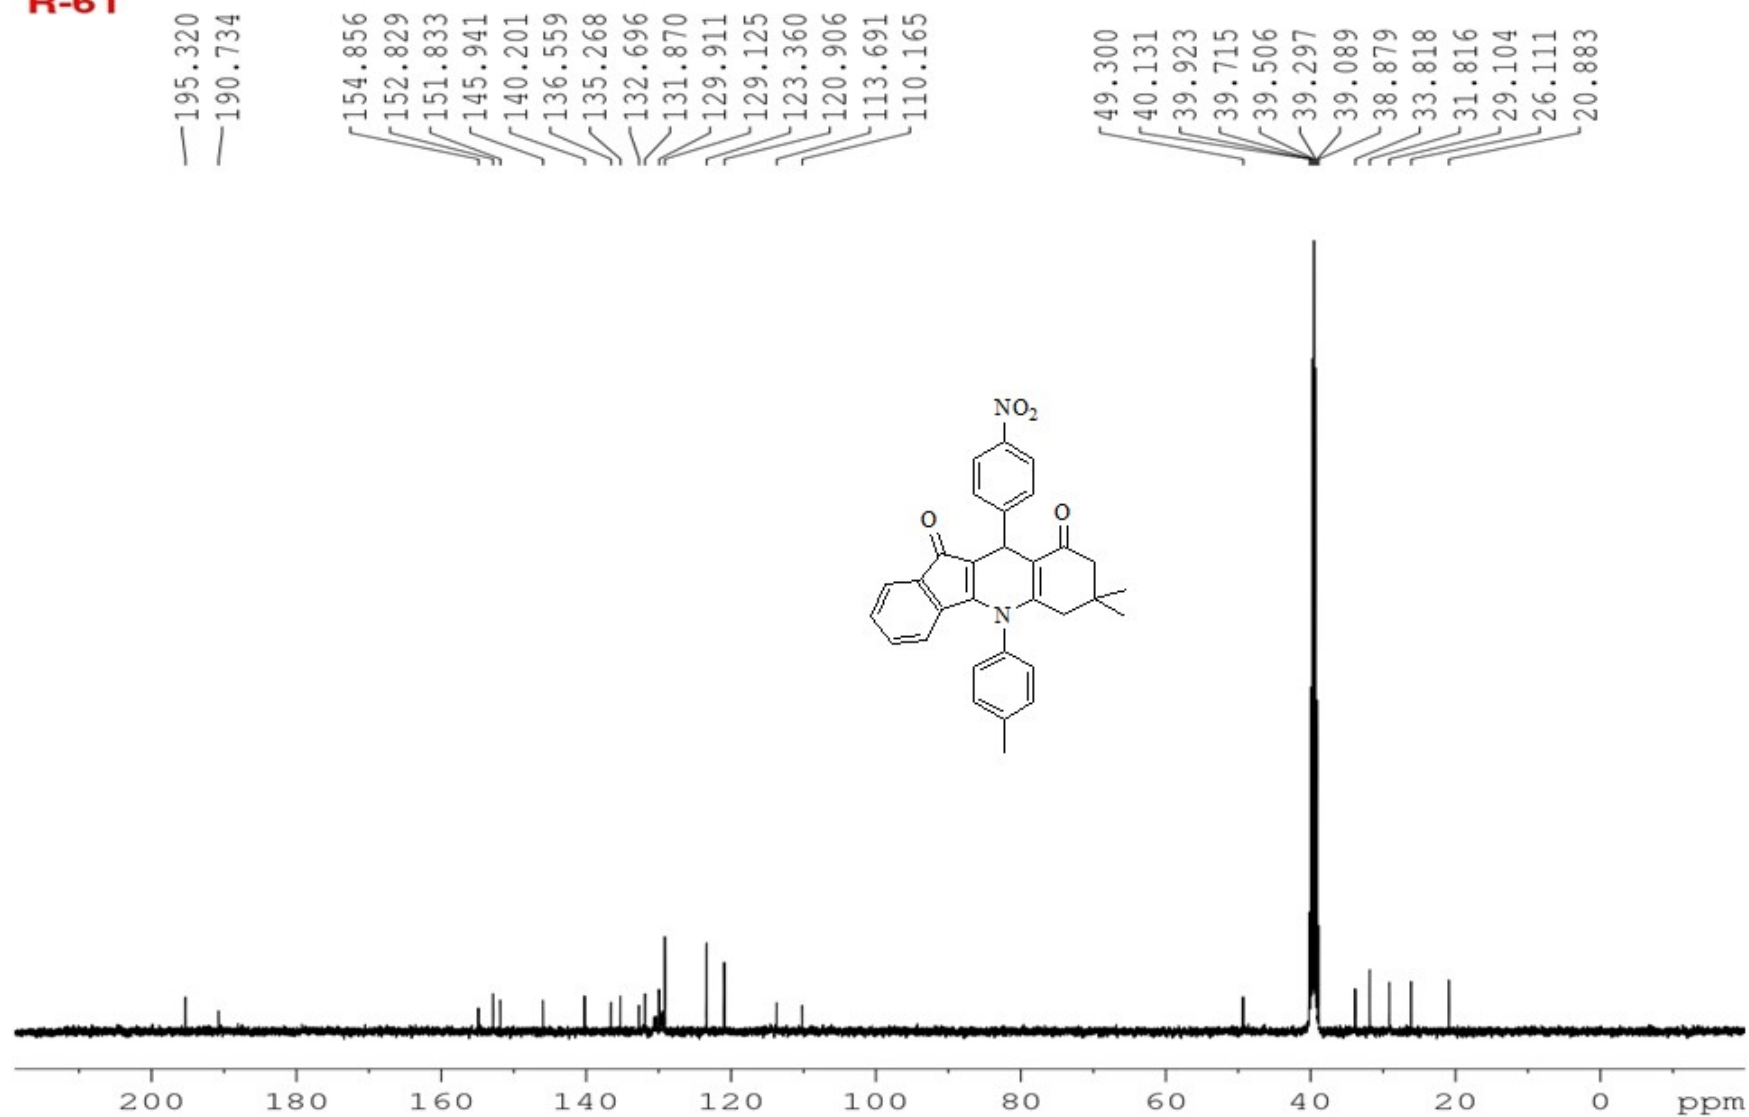

<sup>13</sup>C NMR (5c)

# Spectrum

Line#:1 R.Time:5.7(Scan#:1090)

MassPeaks:602

RawMode:Averaged 5.7-5.8(1089-1091) BasePeak:368(3777280)

BG Mode:Calc. from Peak Group 1 - Event 1

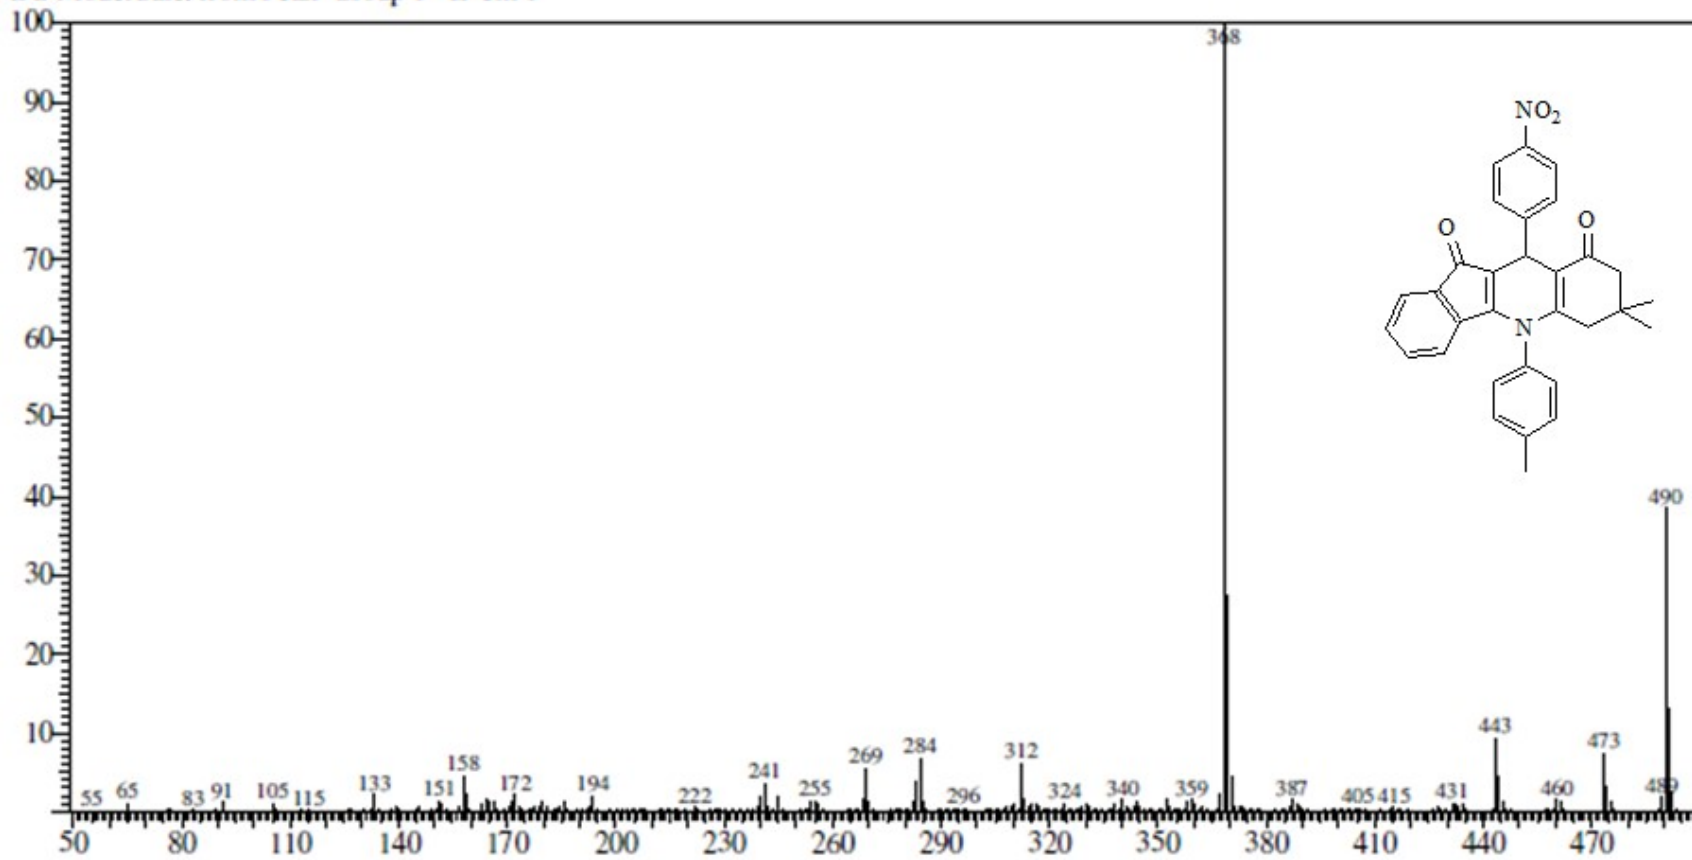

GC-MS MS (5c)

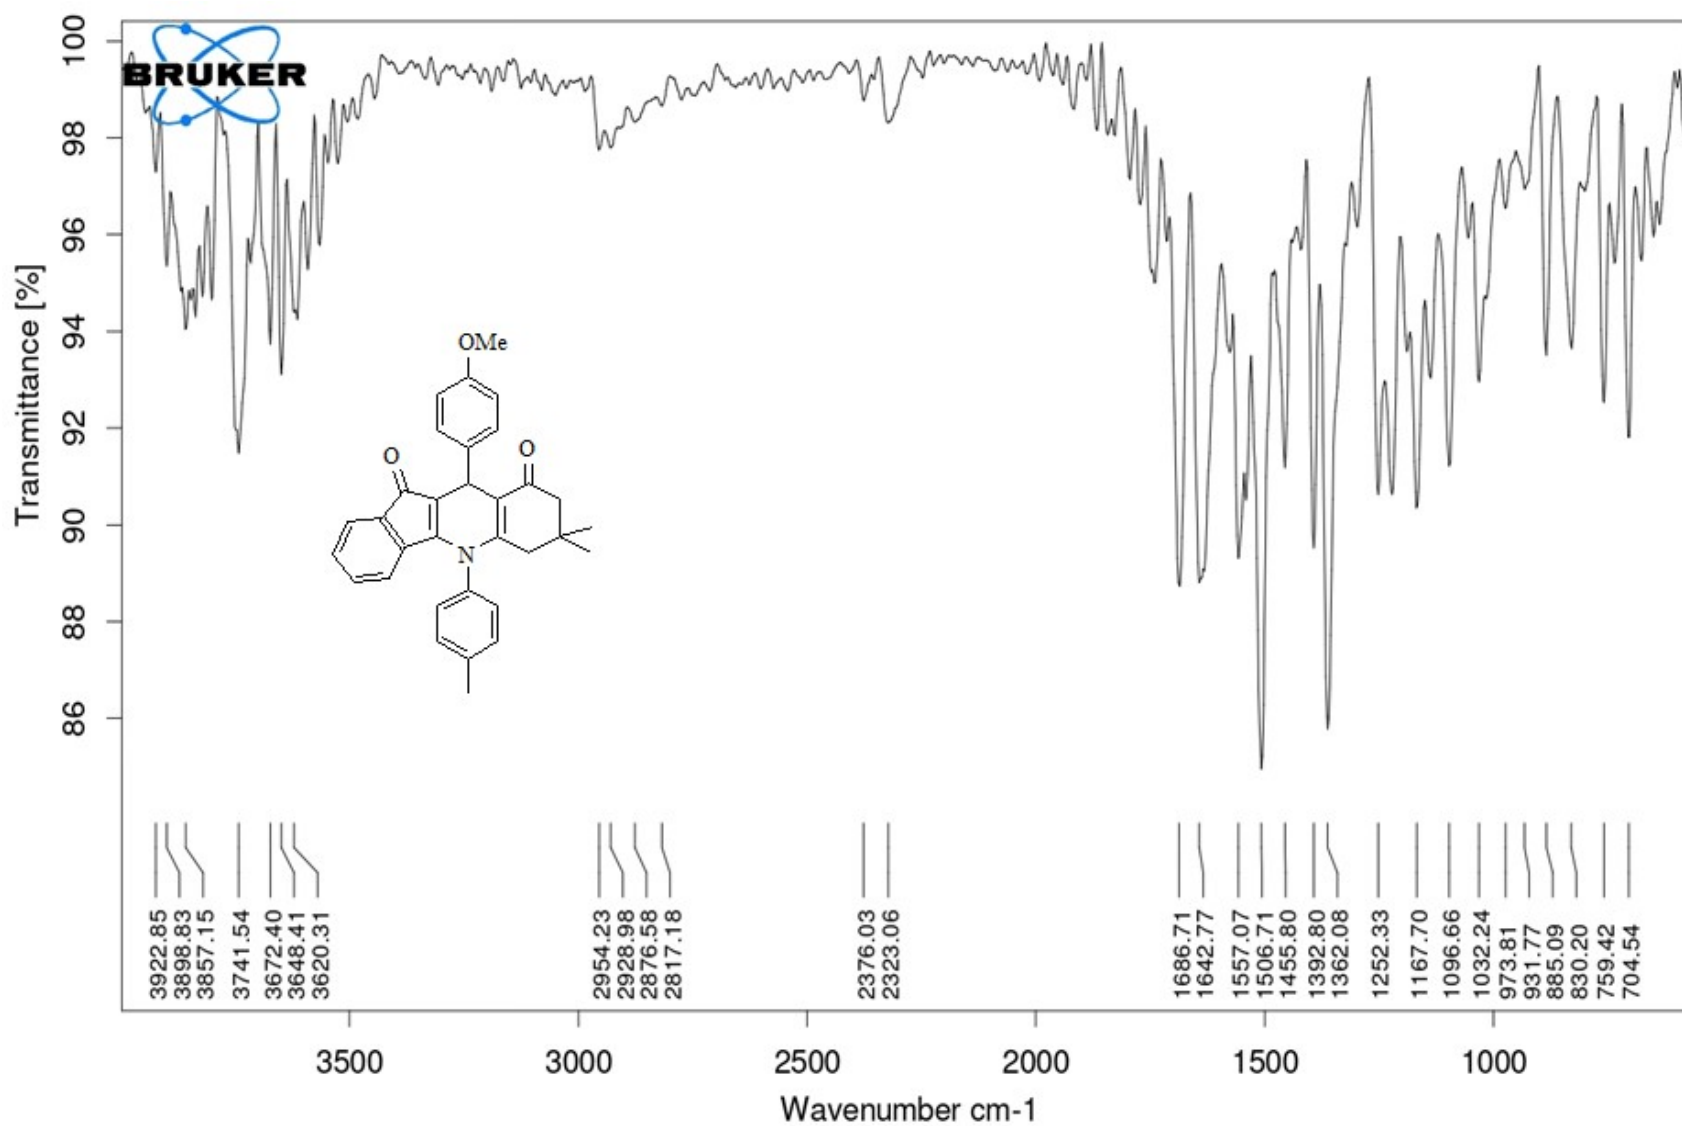

FT-IR (5d)

**R-67**

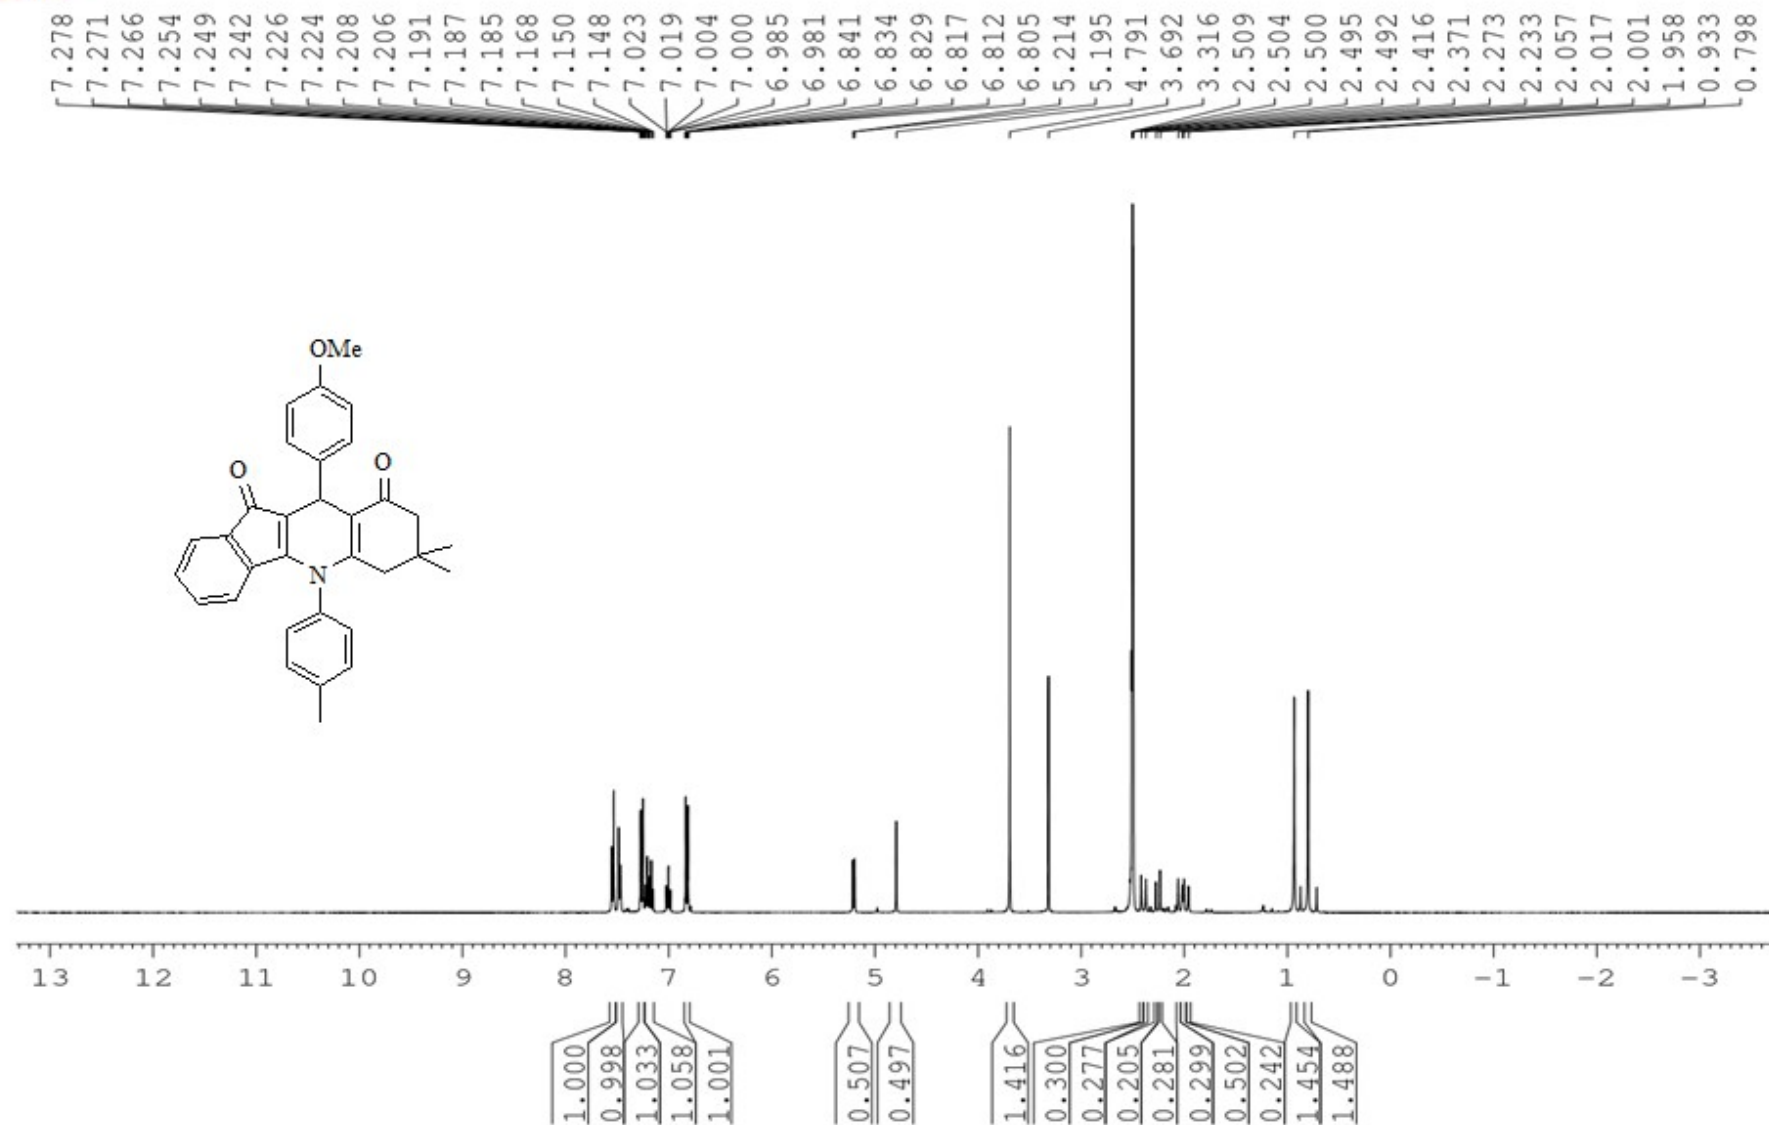

<sup>1</sup>H NMR (5d)

**R-67**

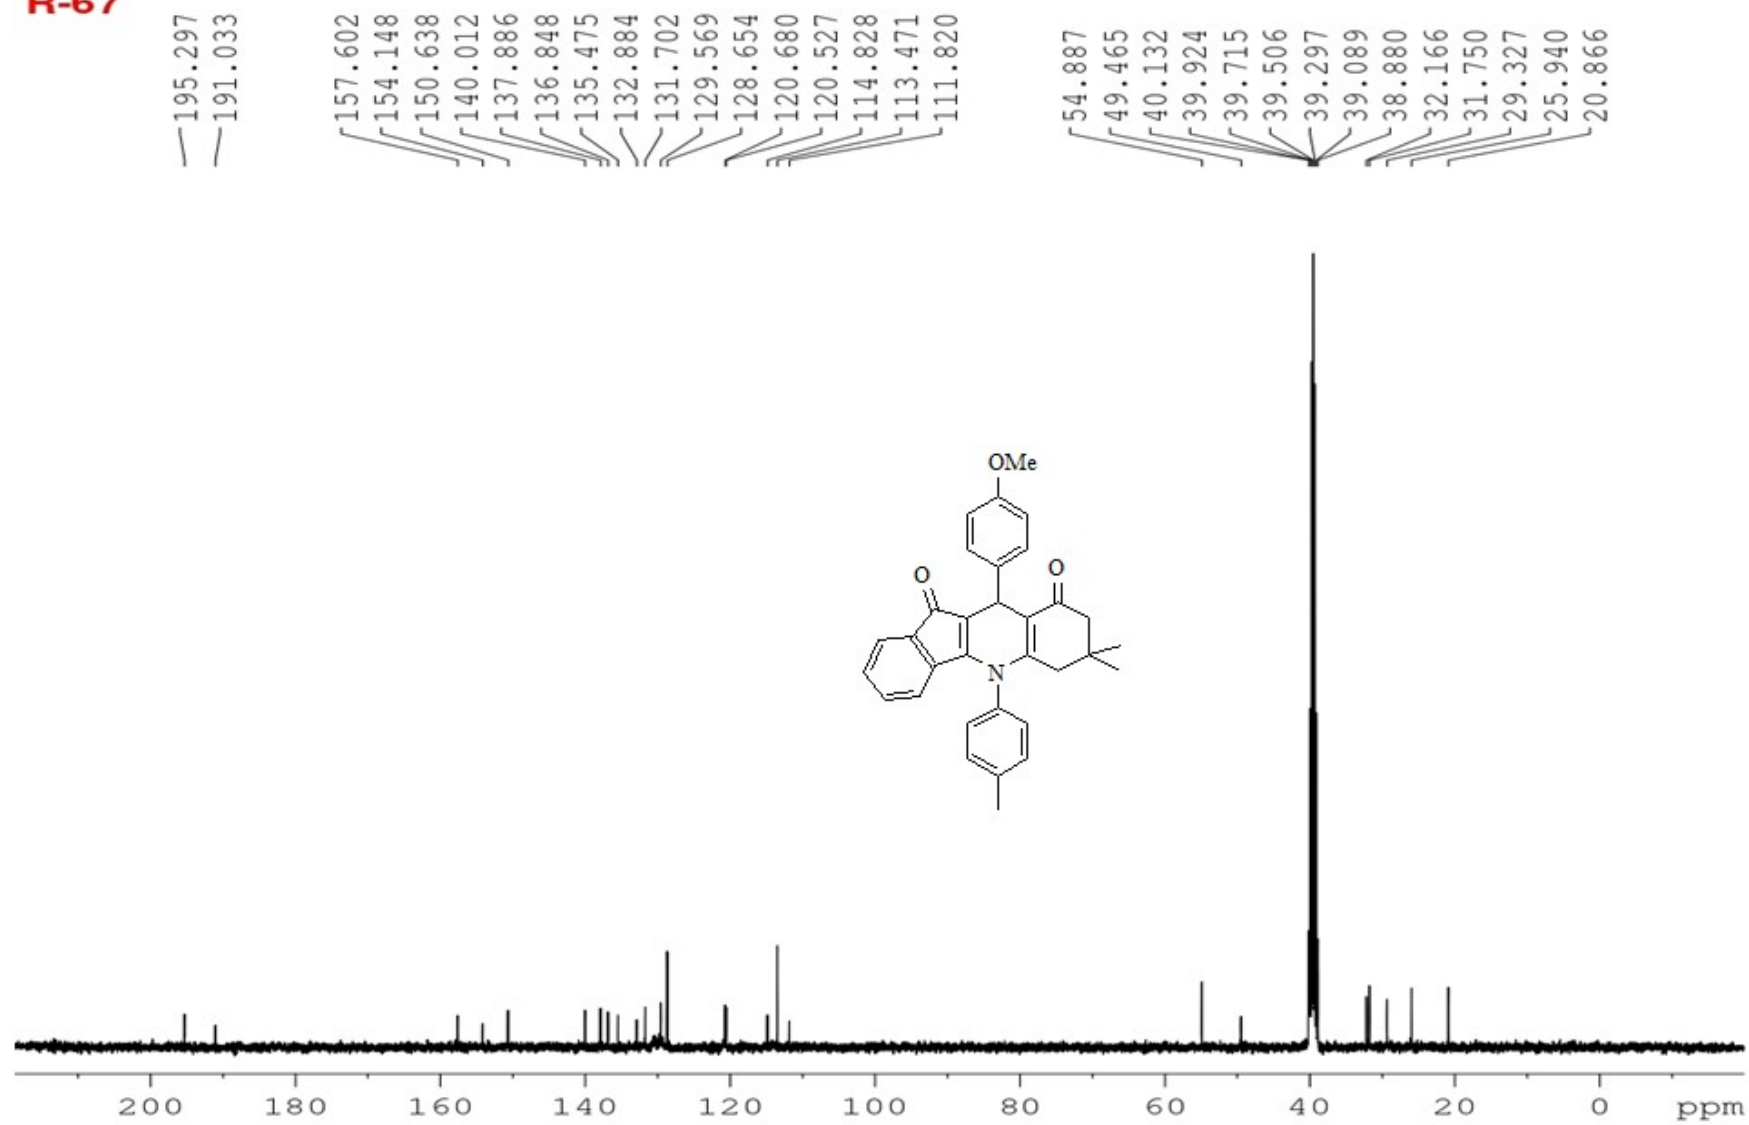

<sup>13</sup>C NMR (5d)

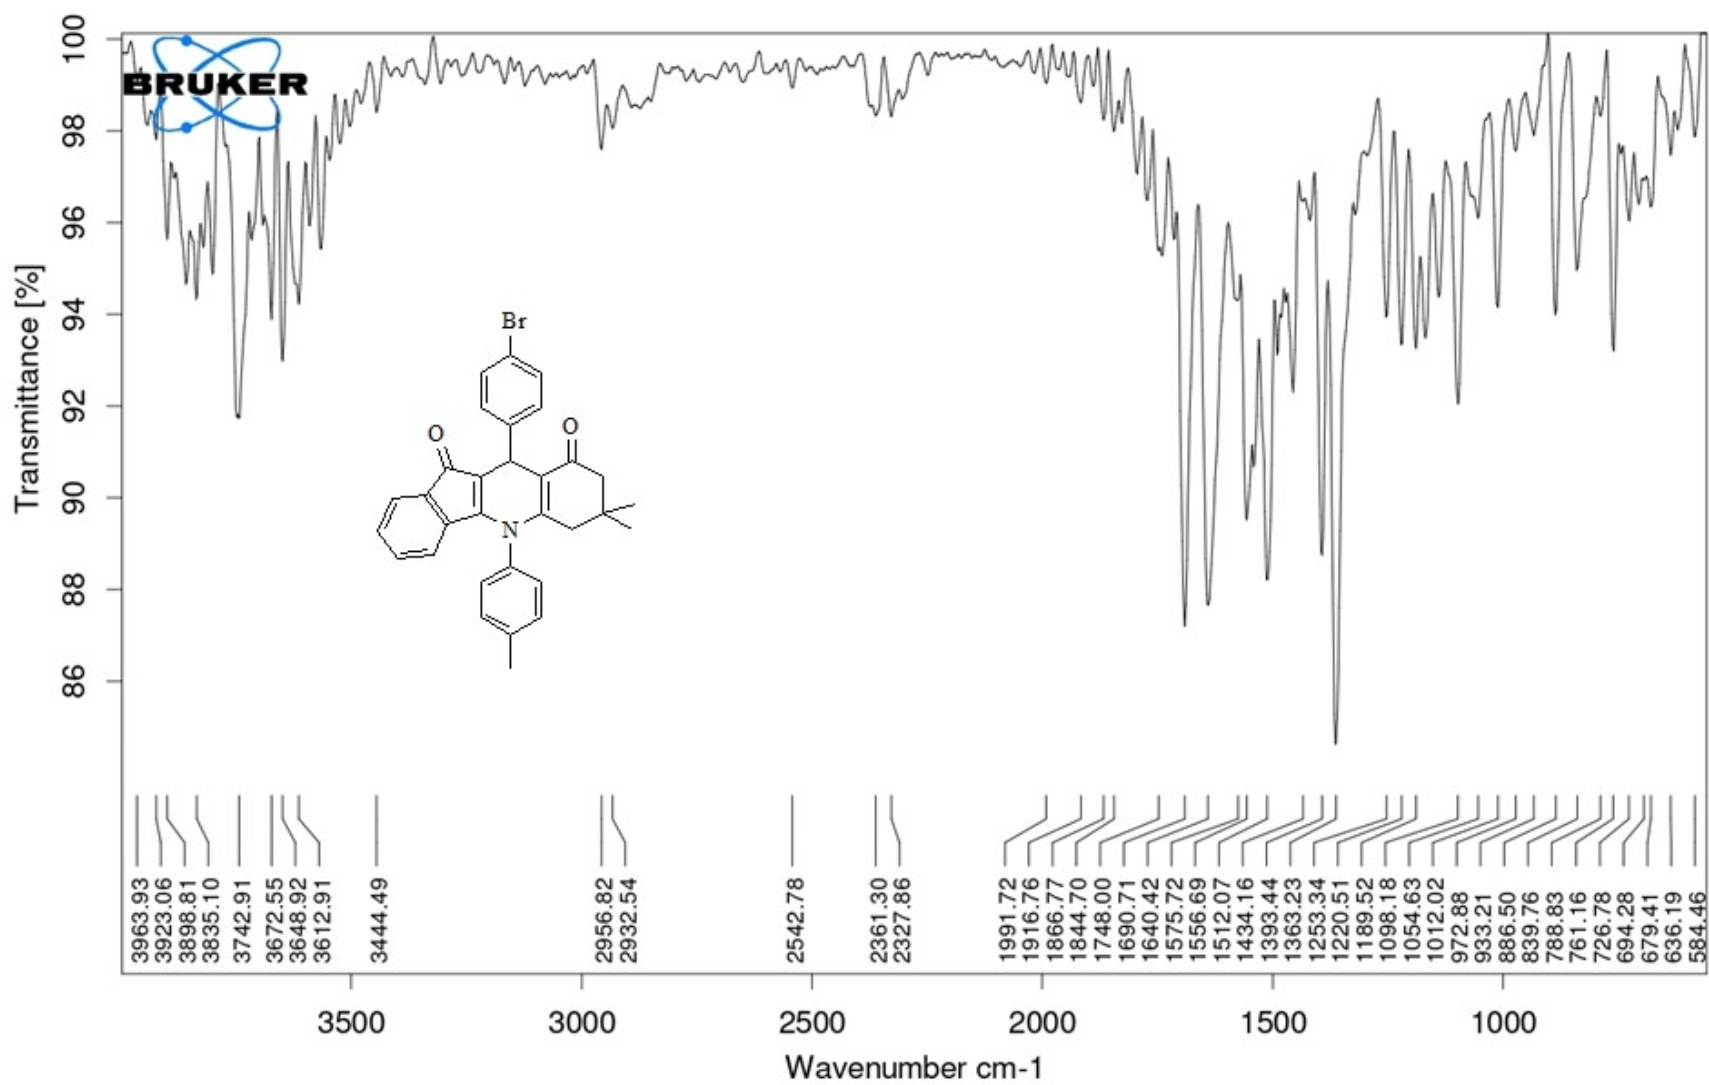

FT-IR (5e)

**R-69**

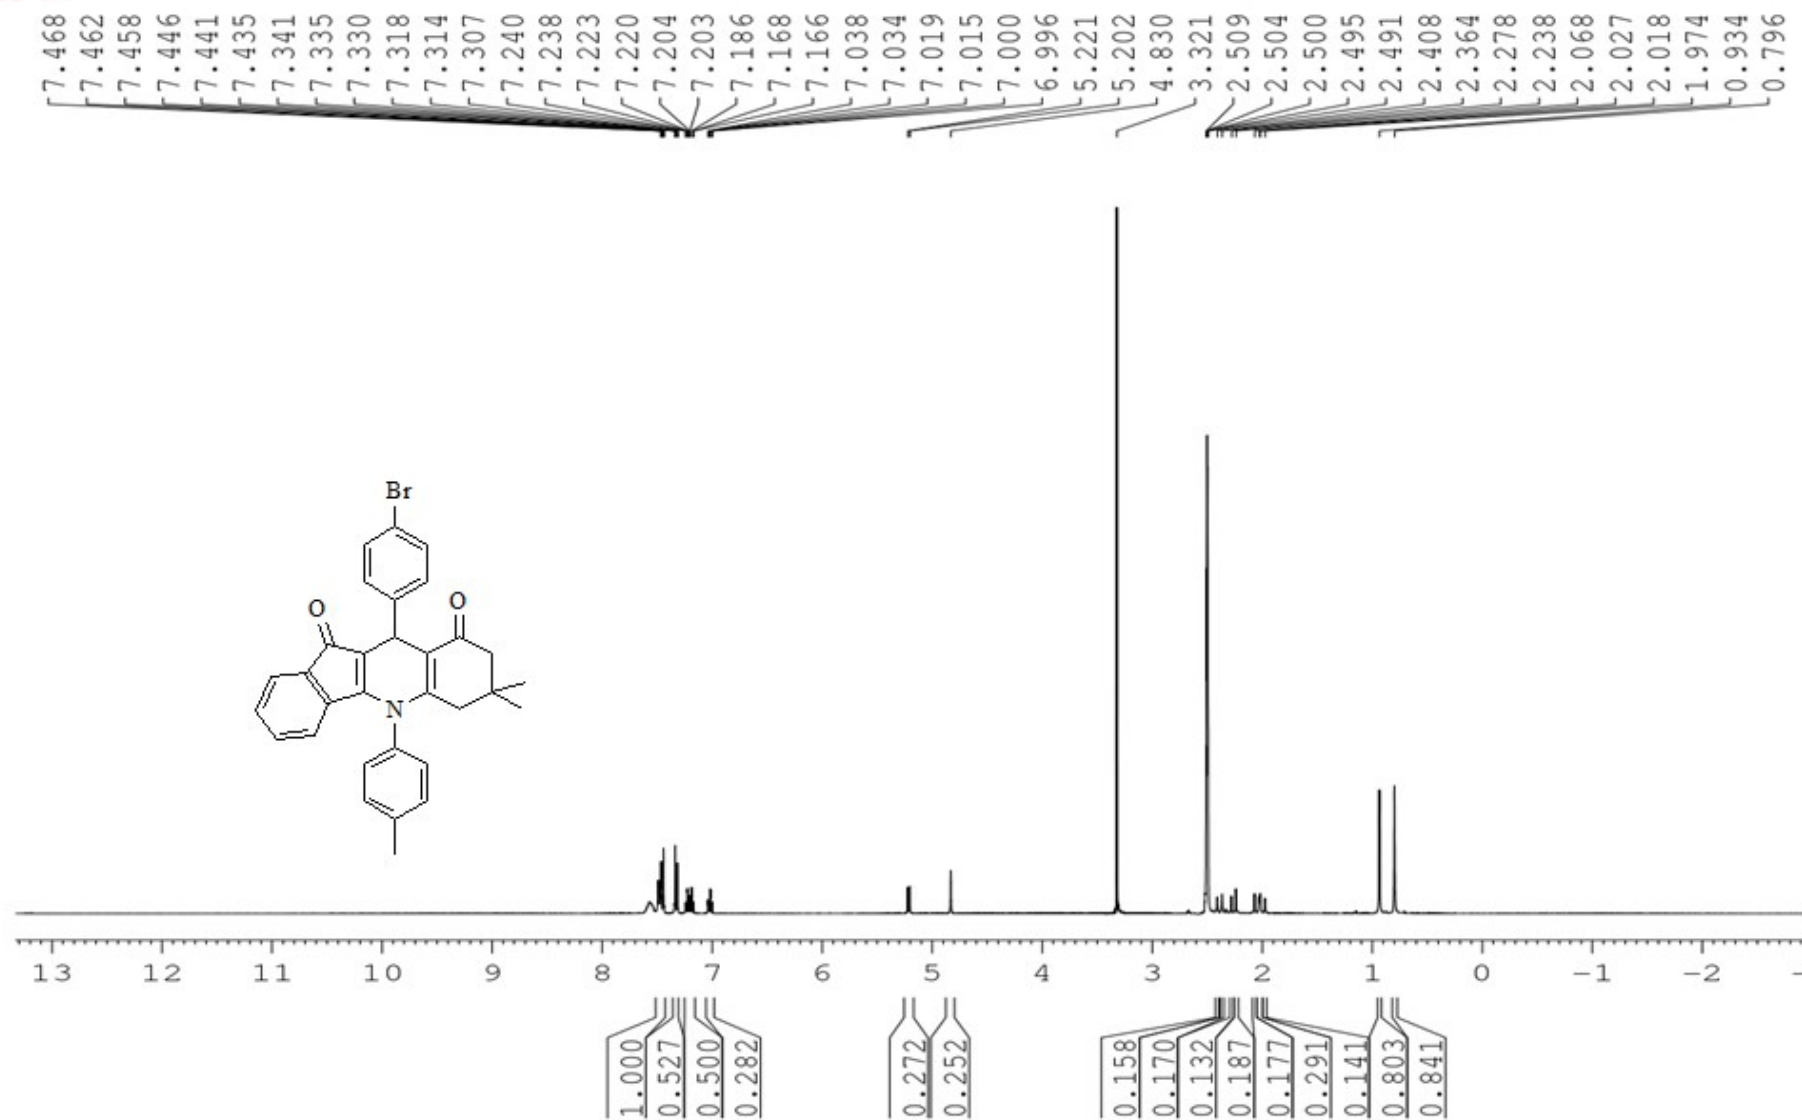

<sup>1</sup>H NMR (5e)

**R-69**

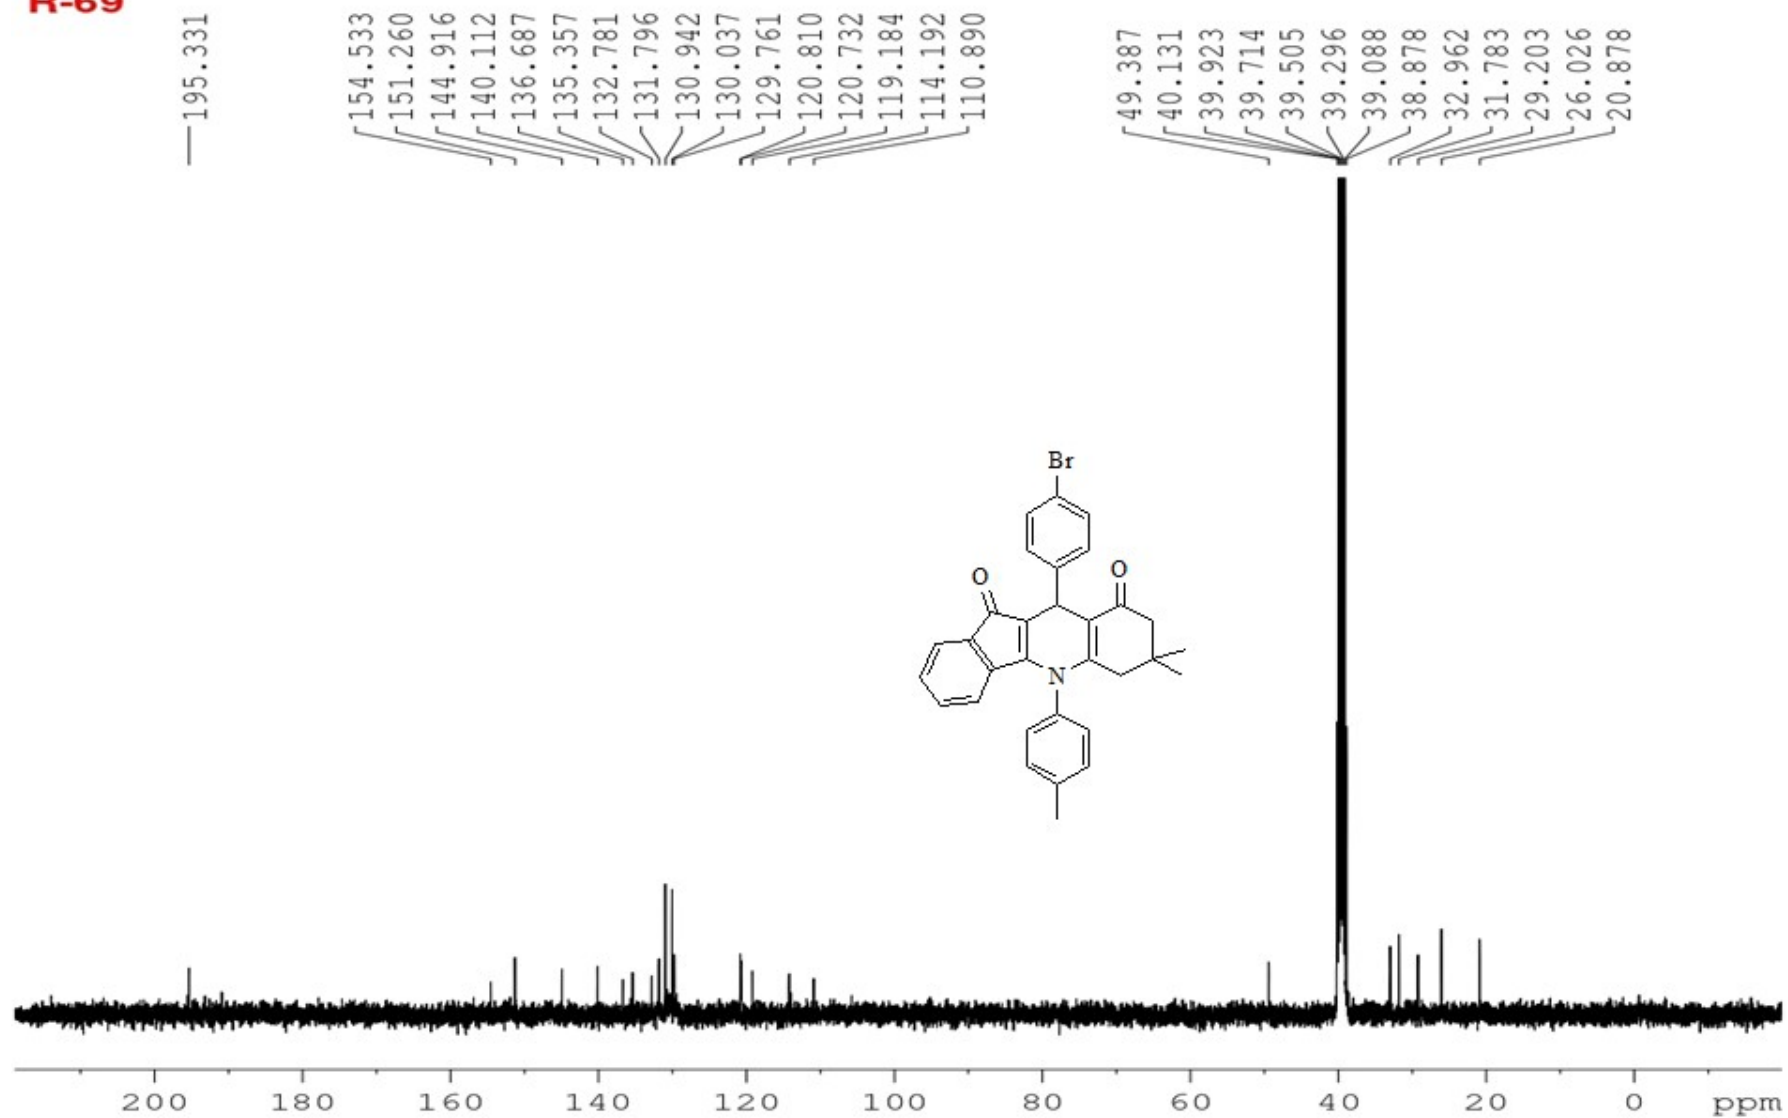

$^{13}\text{C}$  NMR (5e)

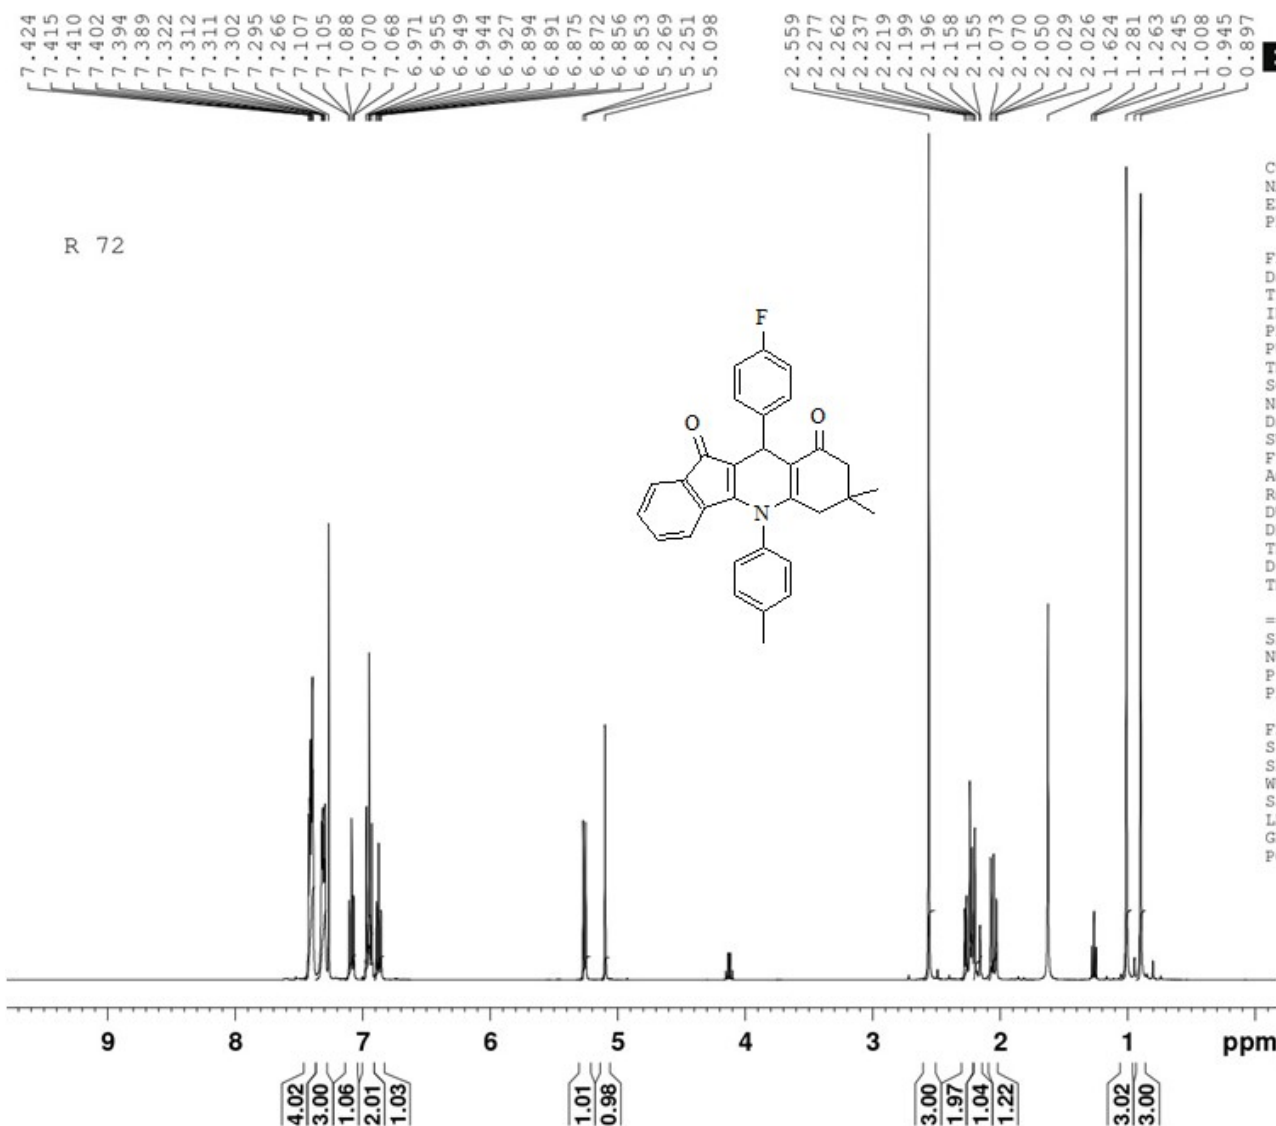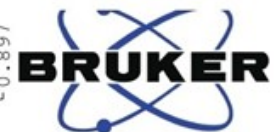

Current Data Parameters  
NAME PAHSUS  
EXPNO 670  
PROCNO 1

F2 - Acquisition Parameters  
Date\_ 20210527  
Time 15.00  
INSTRUM spect  
PROBHD 5 mm BBI 1H/2H  
PULPROG zg30  
TD 65536  
SOLVENT CDCl3  
NS 16  
DS 2  
SWH 8223.685 Hz  
FIDRES 0.125483 Hz  
AQ 3.9845889 sec  
RG 122.9  
DW 60.800 usec  
DE 6.50 usec  
TE 0 K  
D1 1.00000000 sec  
TD0 1

===== CHANNEL f1 =====  
SFO1 400.1324710 MHz  
NUC1 1H  
P1 8.00 usec  
PLW1 11.47000027 W

F2 - Processing parameters  
SI 65536  
SF 400.1300000 MHz  
WDW EM  
SSB 0  
LB 0.30 Hz  
GB 0  
PC 1.00

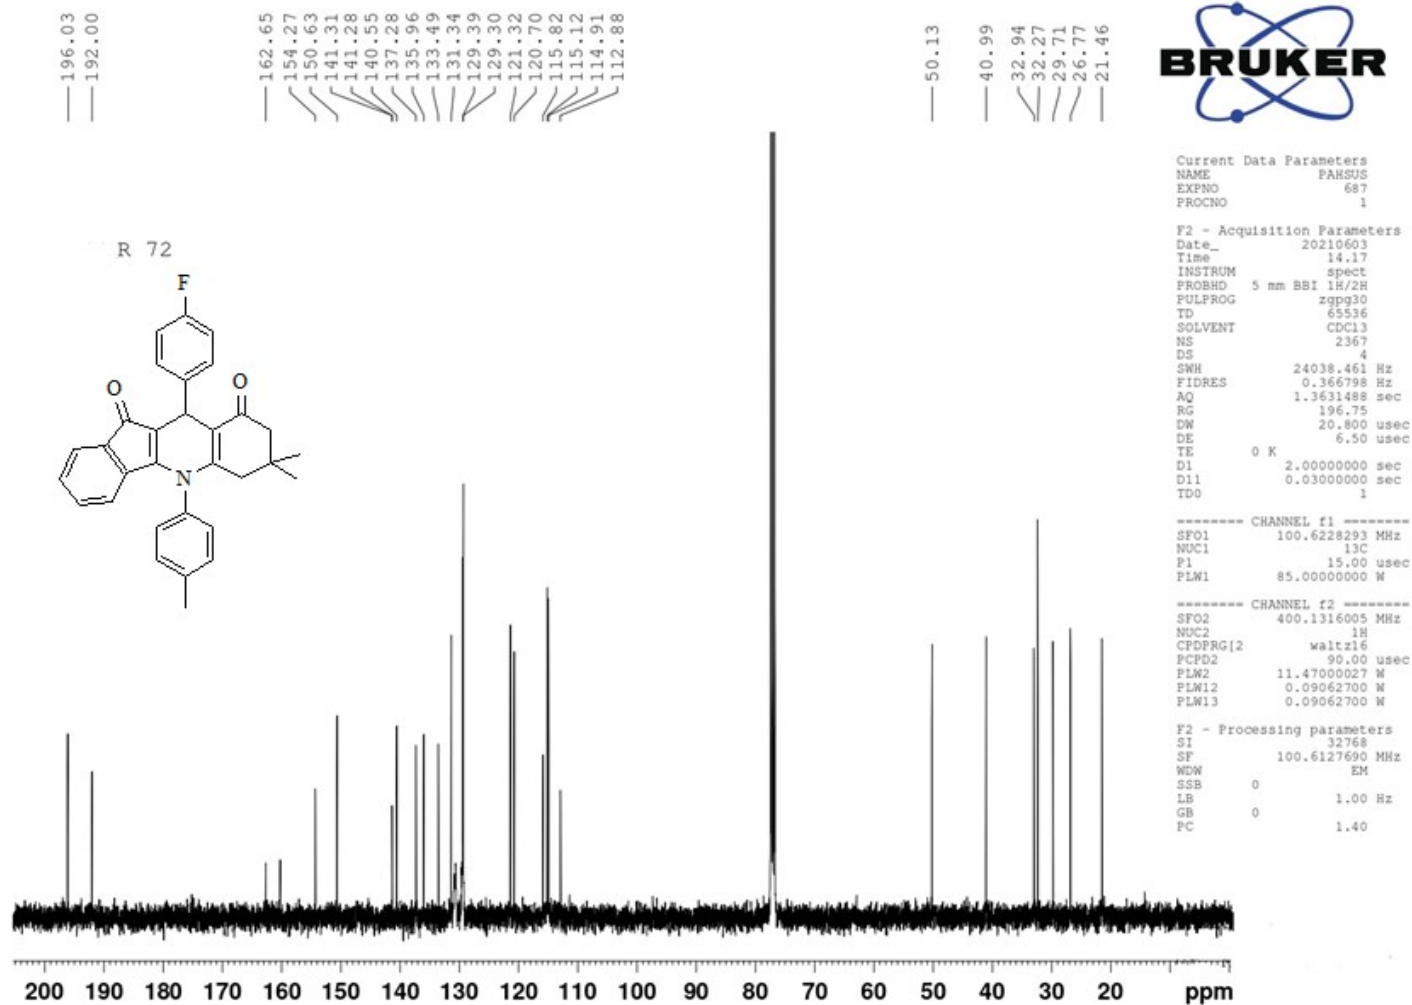

$^{13}\text{C}$  NMR (5f)

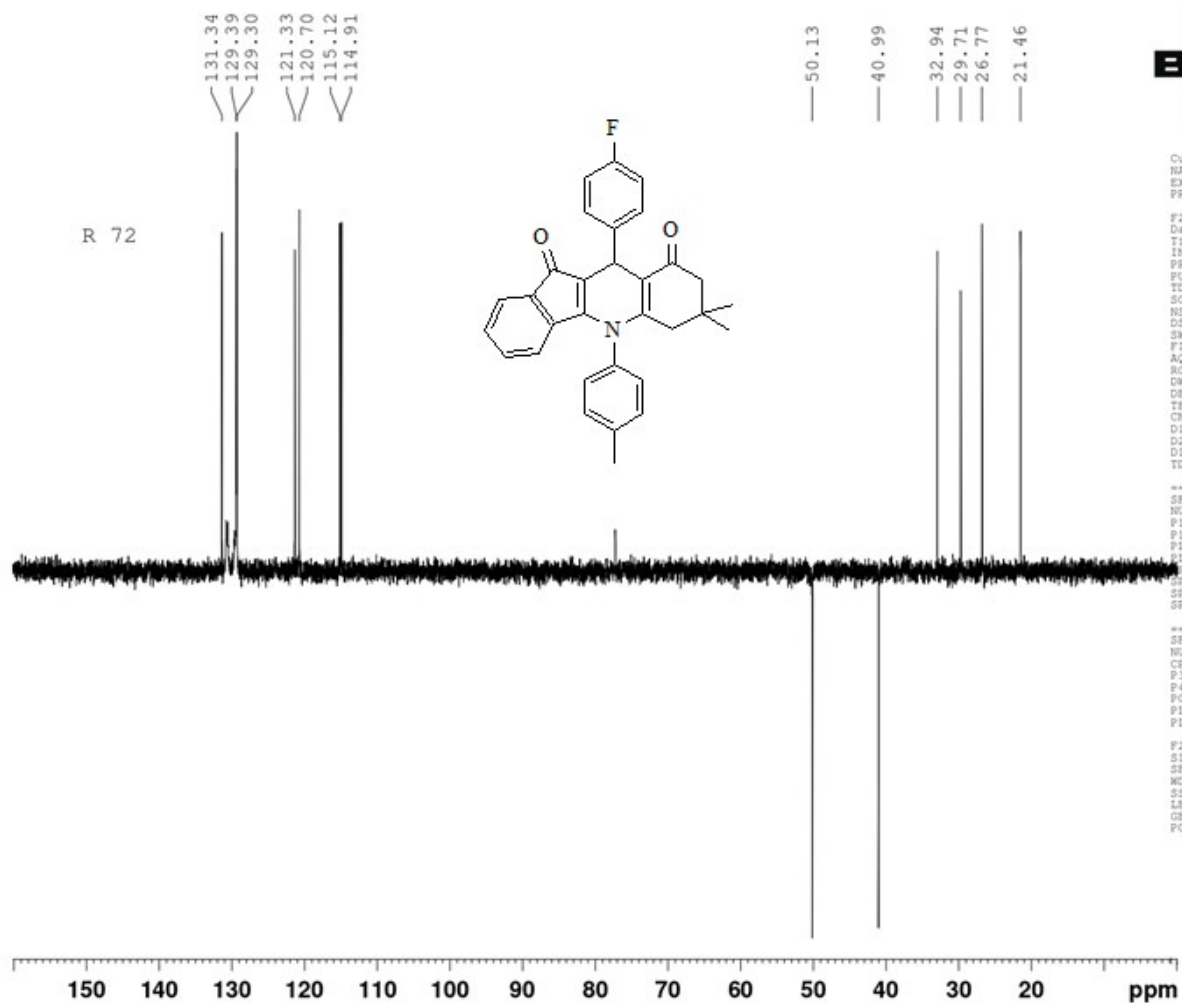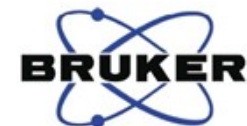

Current Data Parameters  
NAME FAKUS  
EXPNO 686  
PROCNO 1

F2 - Acquisition Parameters  
Date\_ 20210603  
Time 10.37  
INSTRUM spect  
PROBHD 5 mm BBI 1H/2H  
PULPROG zgpg30  
TD 65536  
SOLVENT CDCl3  
NS 1474  
DS 4  
SWH 16129.032 Hz  
FIDRES 0.246110 Hz  
AQ 2.0316160 sec  
RG 196.75  
DM 31.000 usec  
DE 6.50 usec  
TE 0 K  
CST2 145.000000  
D1 2.0000000 sec  
D2 0.00344828 sec  
D12 0.00002000 sec  
TD0 1

===== CHANNEL f1 =====  
SFO1 100.6208171 MHz  
NUC1 13C  
P1 15.00 usec  
PL1 0 W  
PLM1 85.0000000 W  
SFO1S 100.6208171 MHz  
SFO1S 0 Hz  
SFO1S 29.2210067 W  
===== CHANNEL f2 =====  
SFO2 400.1312797 MHz  
NUC2 1H  
SFO2S 400.1312797 MHz  
SFO2S 0 Hz  
SFO2S 11.47000027 W  
===== CHANNEL f3 =====  
SFO3 100.6208171 MHz  
NUC3 13C  
P3 8.00 usec  
PL3 0 W  
PLM3 85.0000000 W  
SFO3S 100.6208171 MHz  
SFO3S 0 Hz  
SFO3S 11.47000027 W

F2 - Processing parameters  
SI 32768  
SF 100.6127690 MHz  
WDW EM  
SSB 0  
LB 1.00 Hz  
GB 0  
PC 1.40

DEPT <sup>13</sup>C NMR (5f)

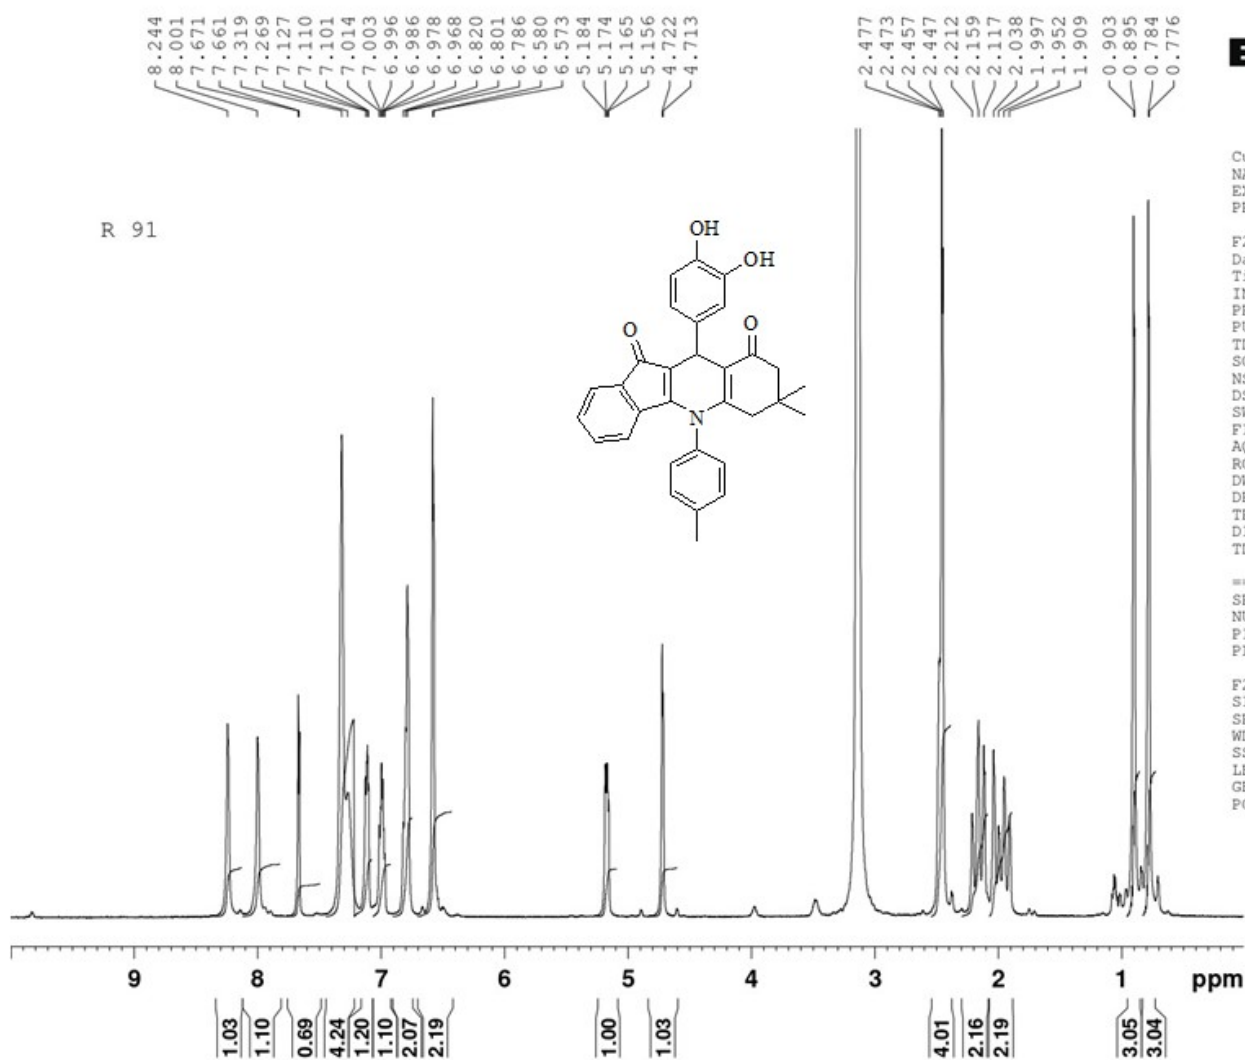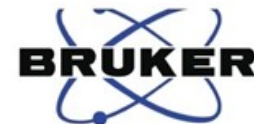

Current Data Parameters  
NAME PAHSUS  
EXPNO 674  
PROCNO 1

F2 - Acquisition Parameters  
Date\_ 20210527  
Time 15.27  
INSTRUM spect  
PROBHD 5 mm BBI 1H/2H  
PULPROG zg30  
TD 65536  
SOLVENT DMSO  
NS 16  
DS 2  
SWH 8223.685 Hz  
FIDRES 0.125483 Hz  
AQ 3.9845889 sec  
RG 98.64  
DW 60.800 usec  
DE 6.50 usec  
TE 0 K  
D1 1.00000000 sec  
TD0 1

===== CHANNEL f1 =====  
SFO1 400.1324710 MHz  
NUC1 1H  
P1 8.00 usec  
PLW1 11.47000027 W

F2 - Processing parameters  
SI 65536  
SF 400.1300000 MHz  
WDW EM  
SSB 0  
LB 0.30 Hz  
GB 0  
PC 1.00

<sup>1</sup>H NMR (5g)

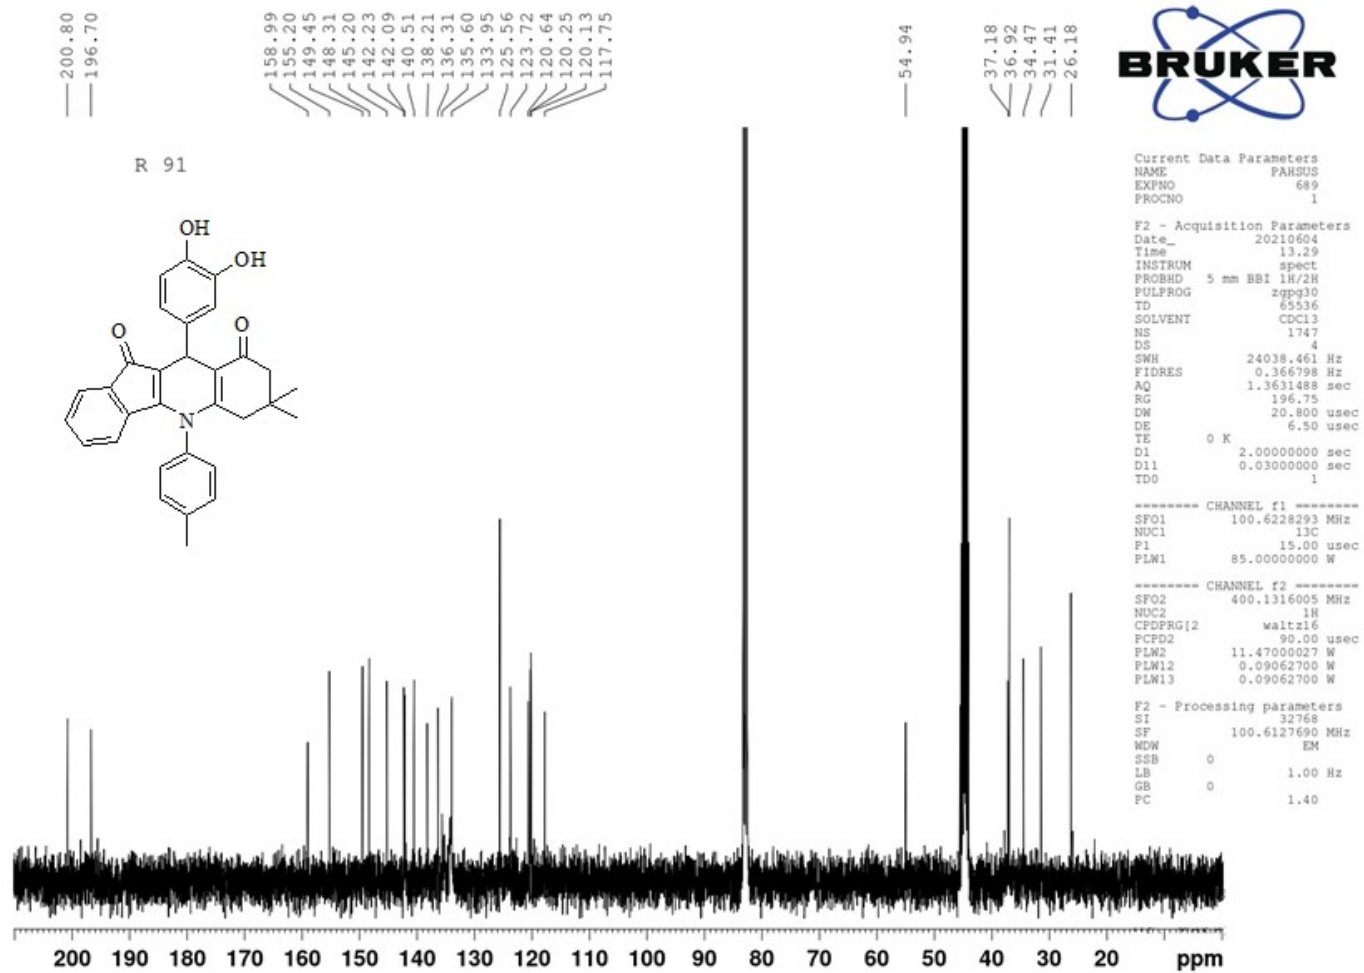

<sup>13</sup>C NMR (5g)

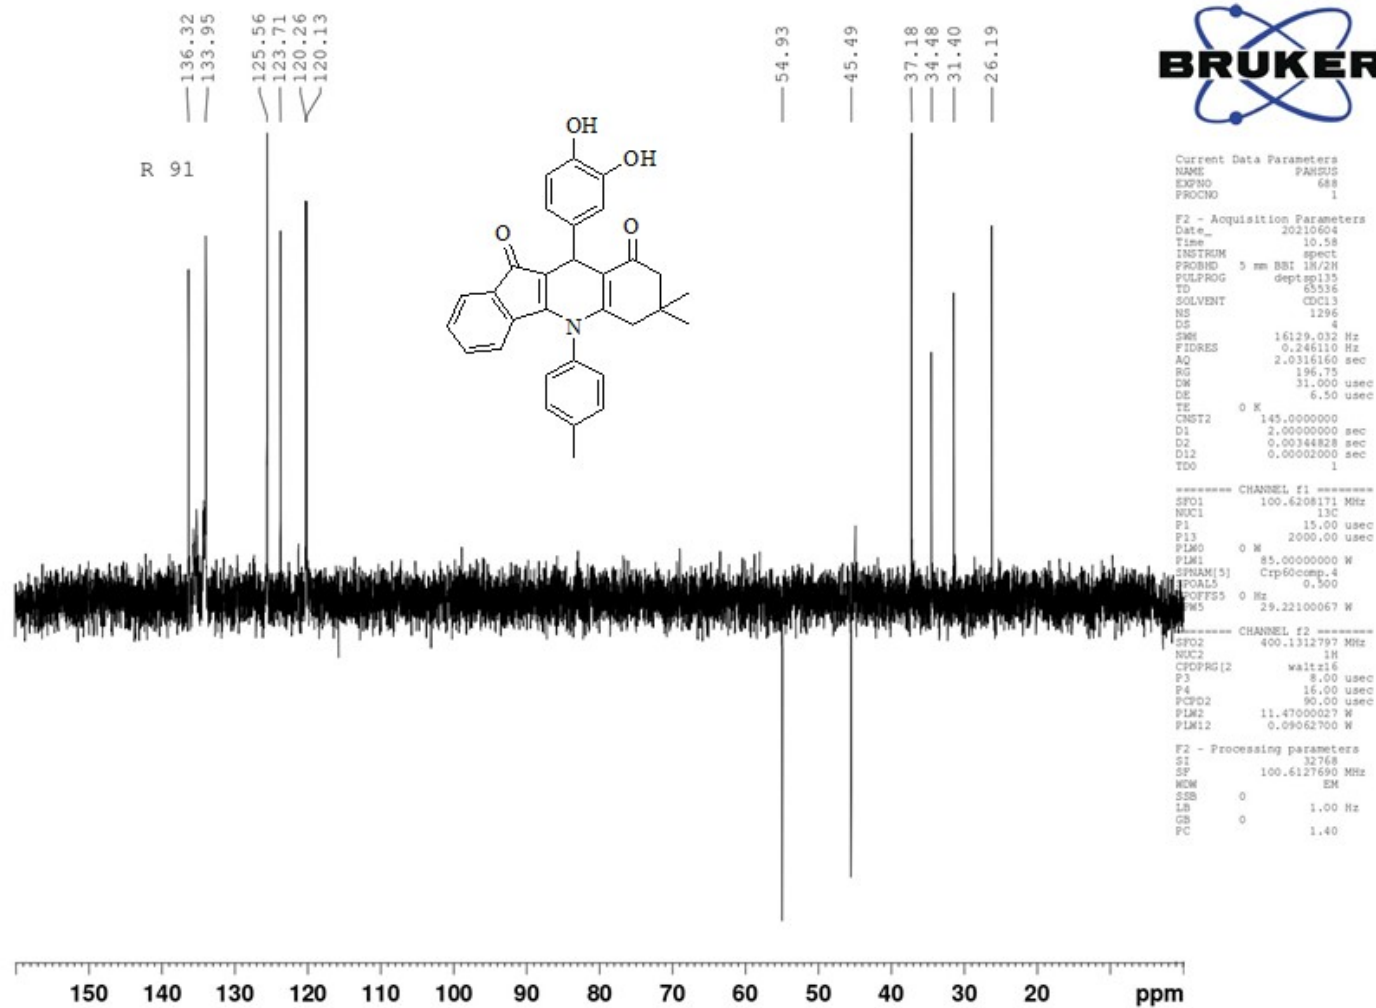

DEPT  $^{13}\text{C}$  NMR (5g)

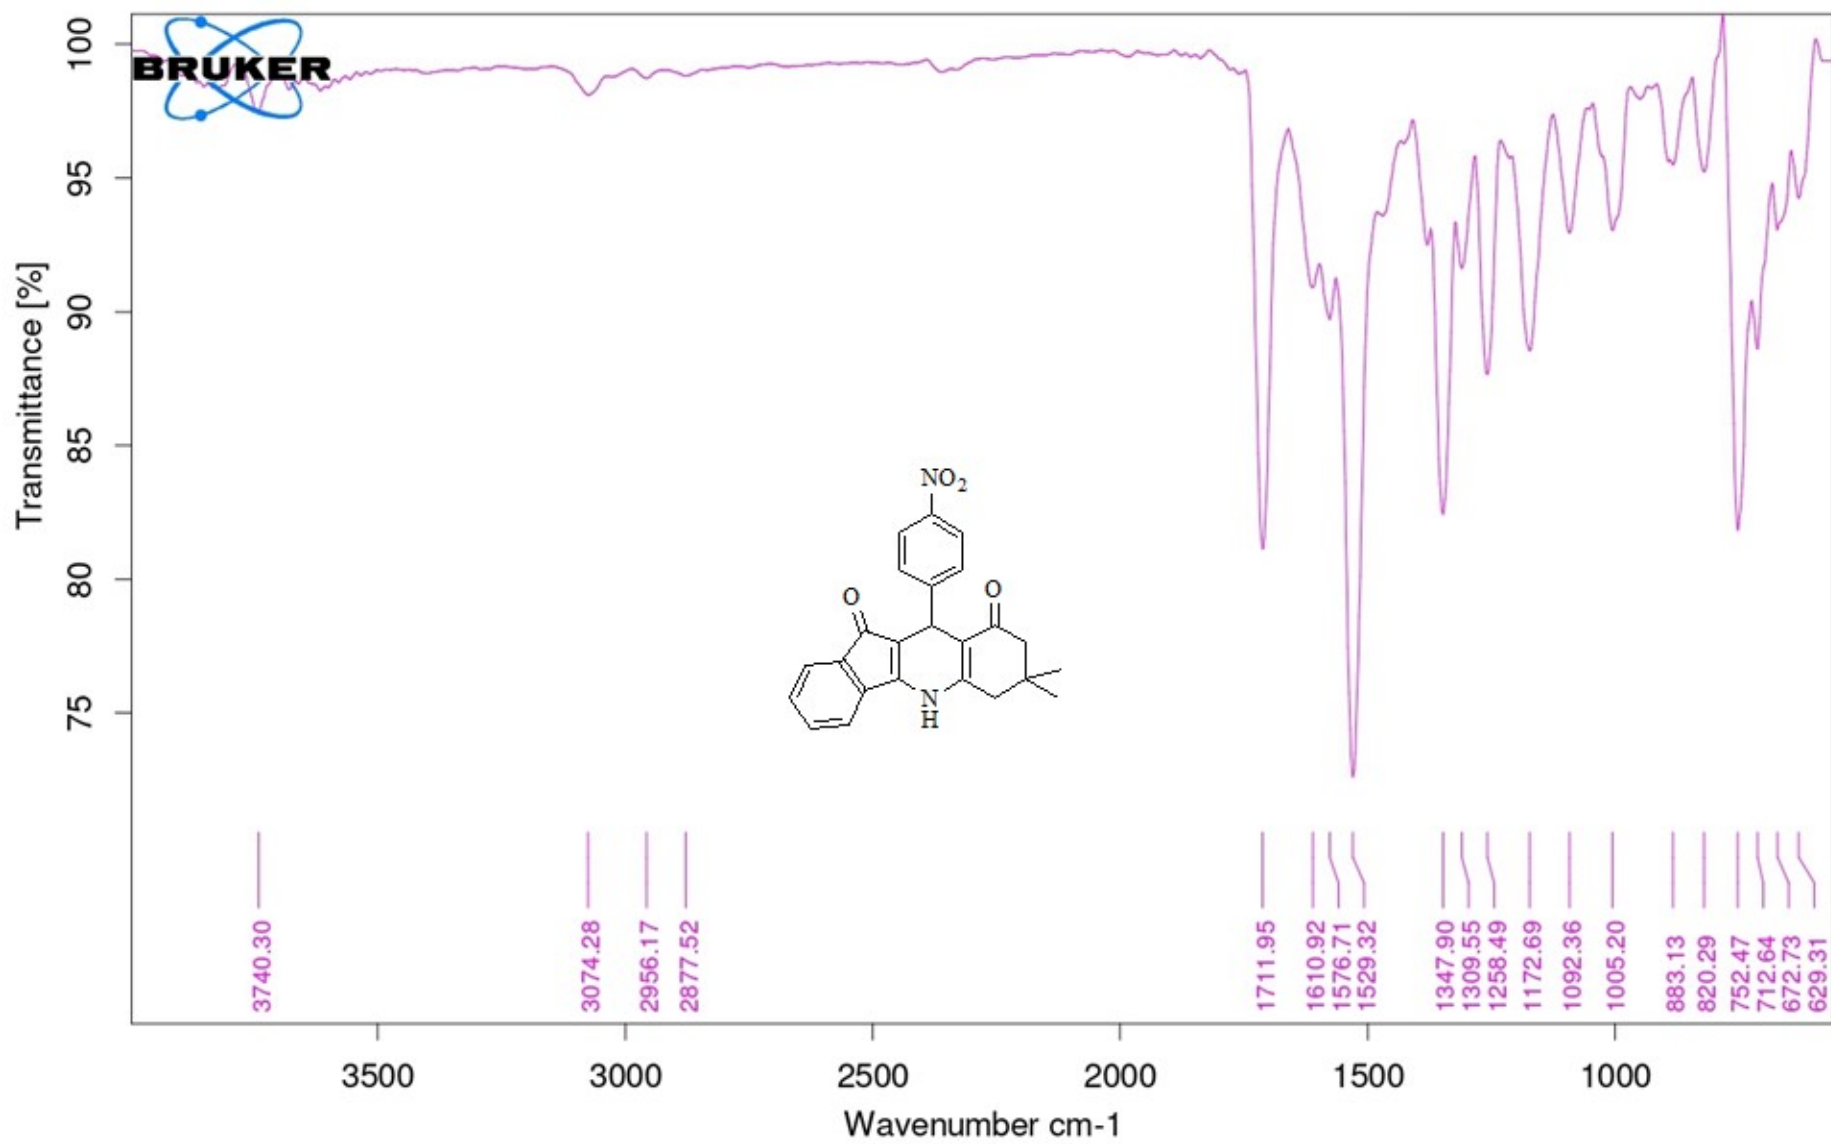

FT-IR (7a)

**R-78**

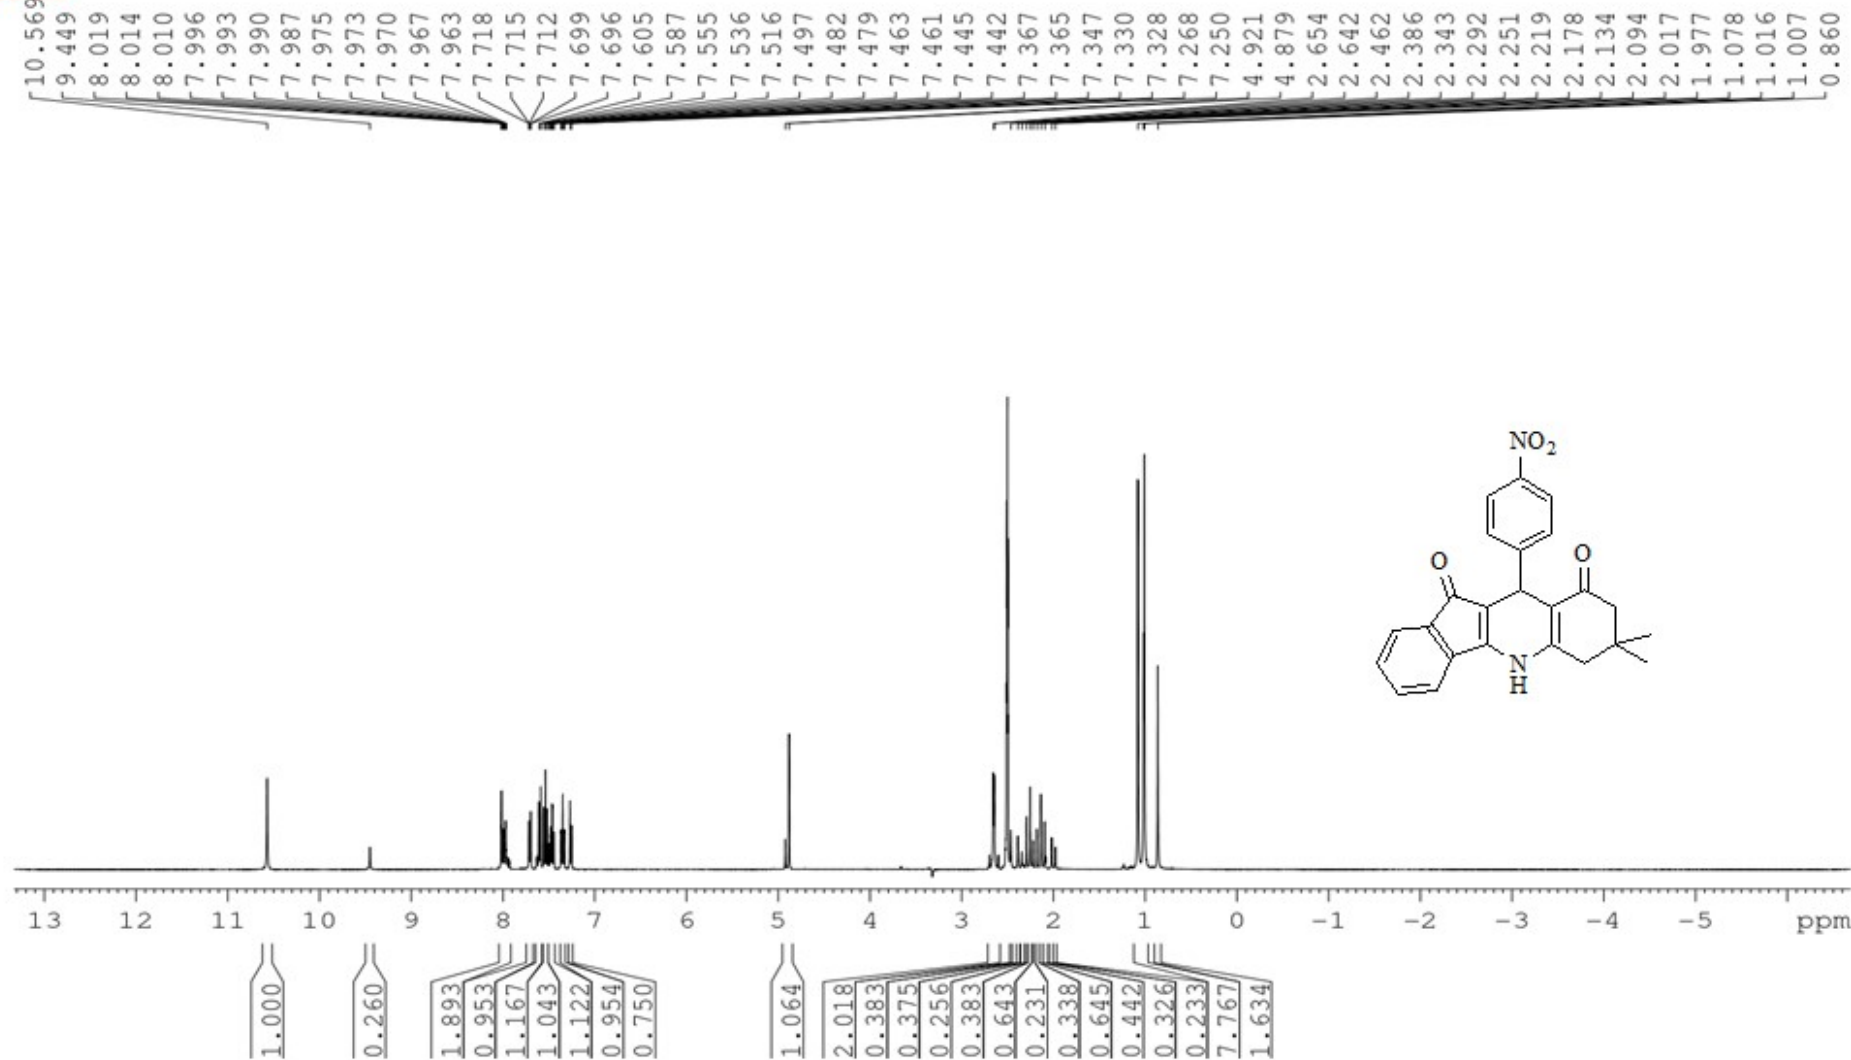

**R-78**

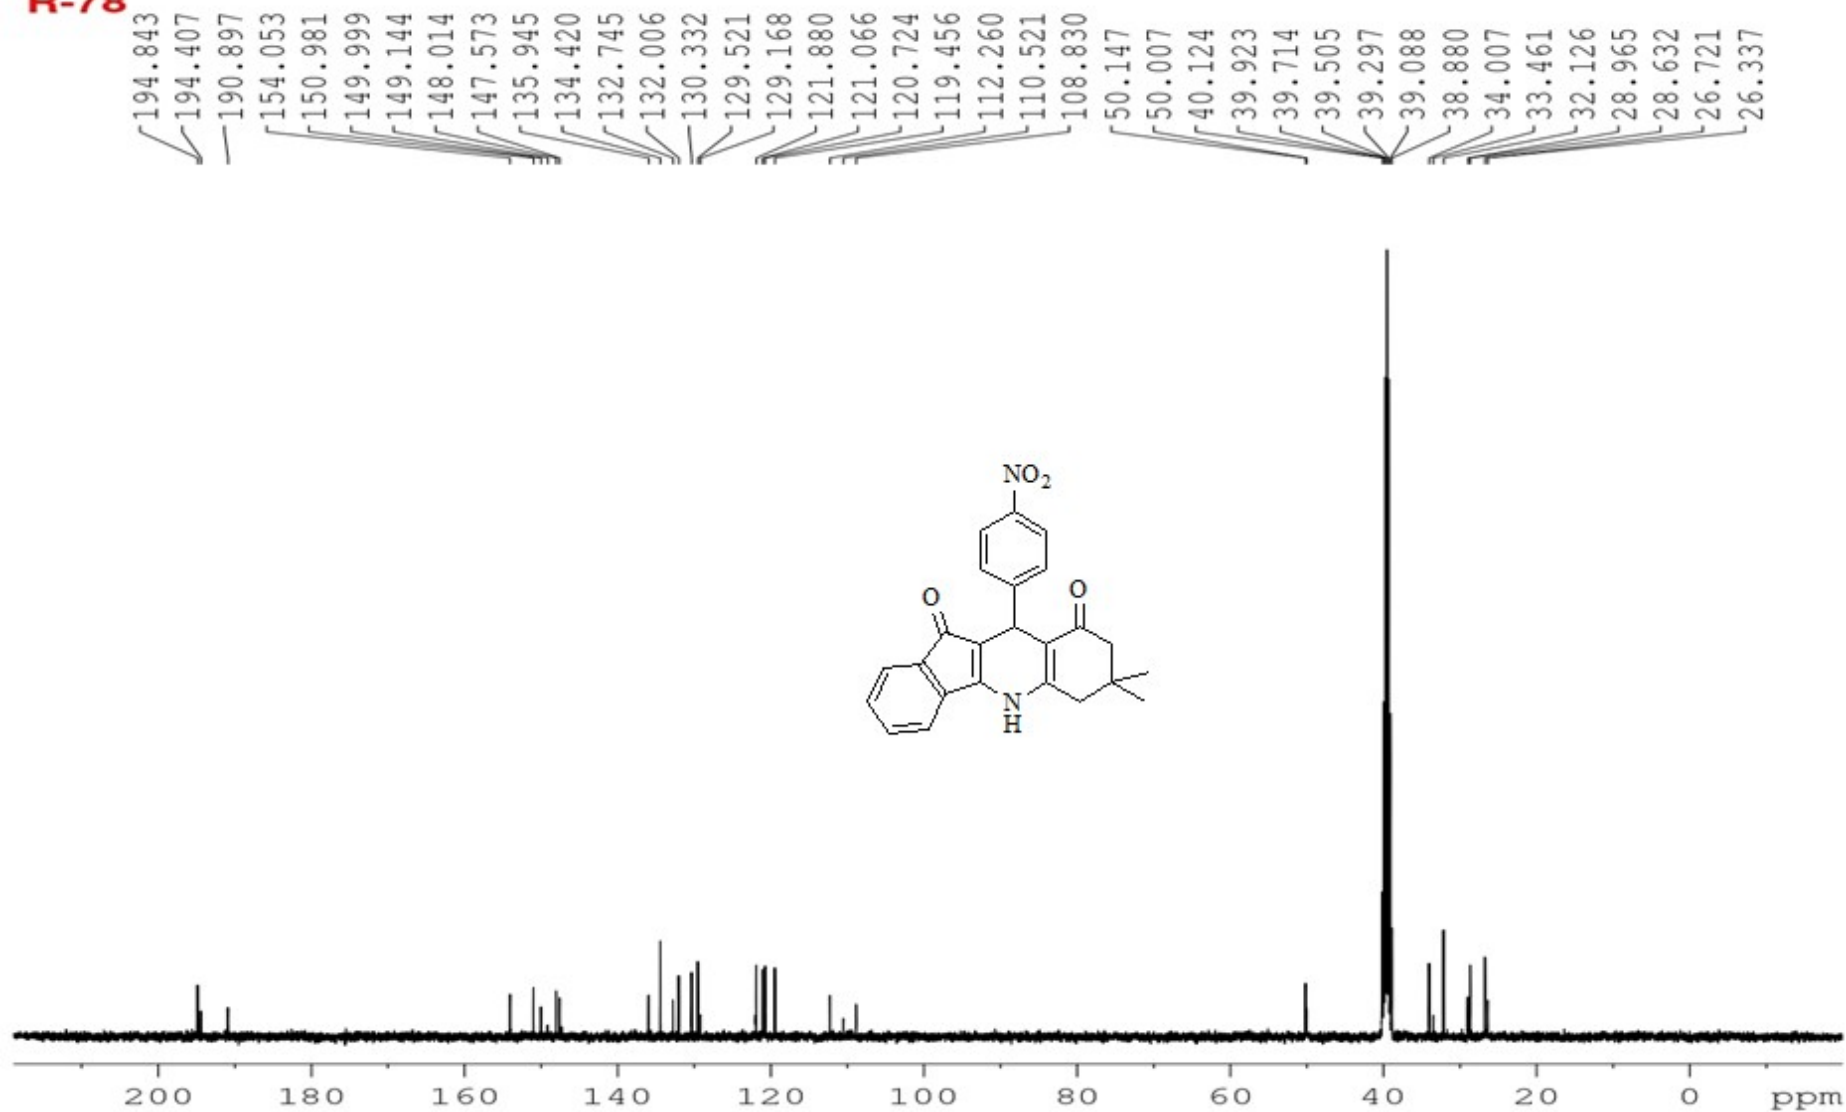

$^{13}\text{C}$  NMR (7a)

# Spectrum

Line#:1 R.Time:7.2(Scan#:1379)

MassPeaks:606

RawMode:Averaged 7.2-7.2(1378-1380) BasePeak:278(4353507)

BG Mode:Calc. from Peak Group 1 - Event 1

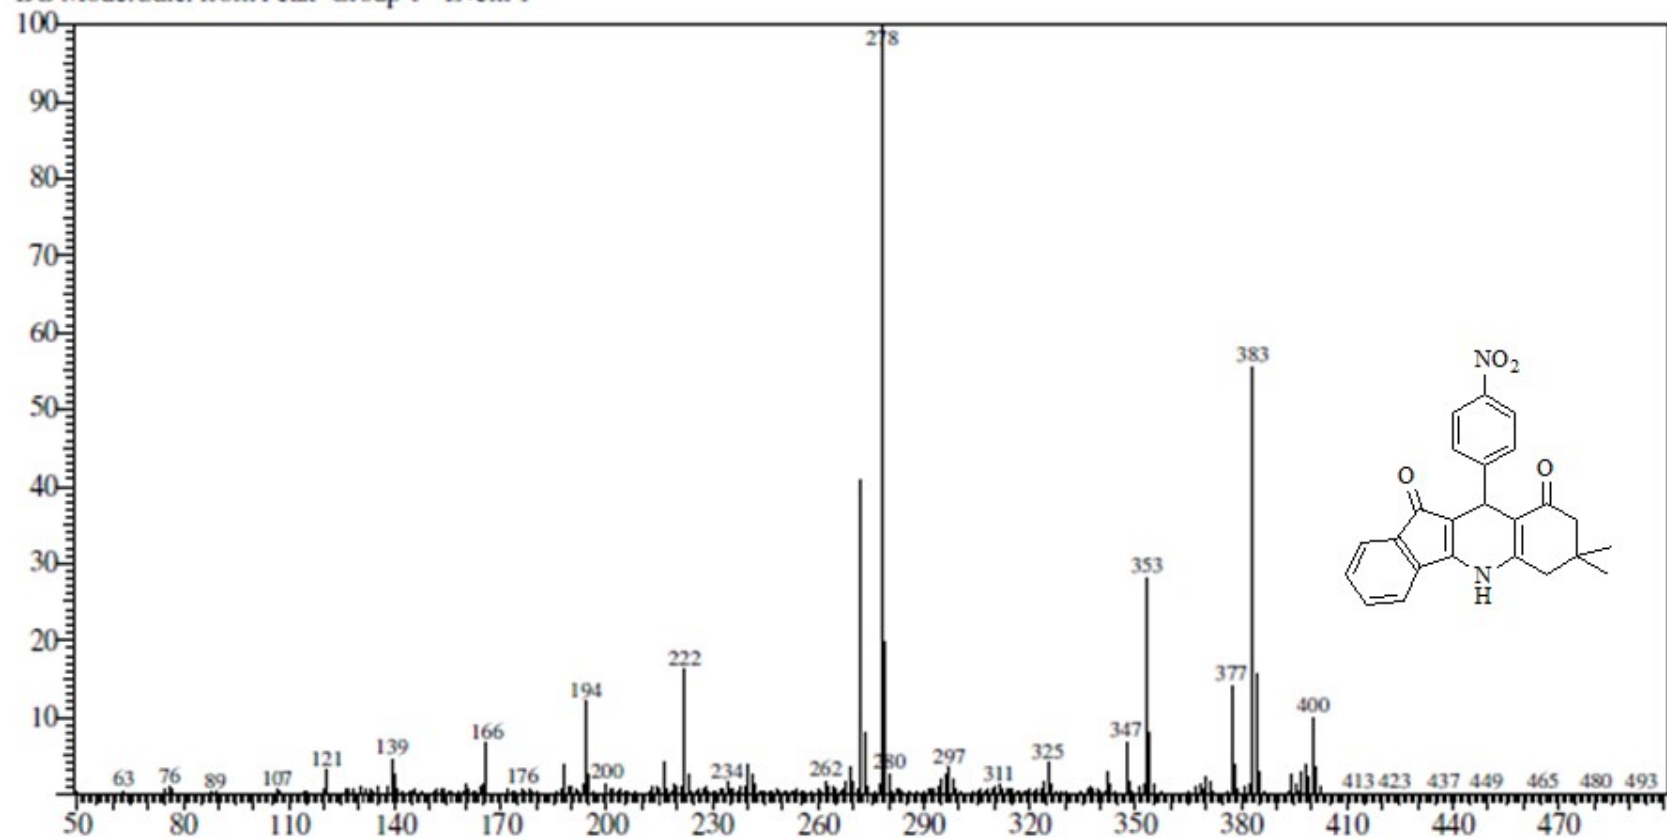

GC-MS MS (7a)

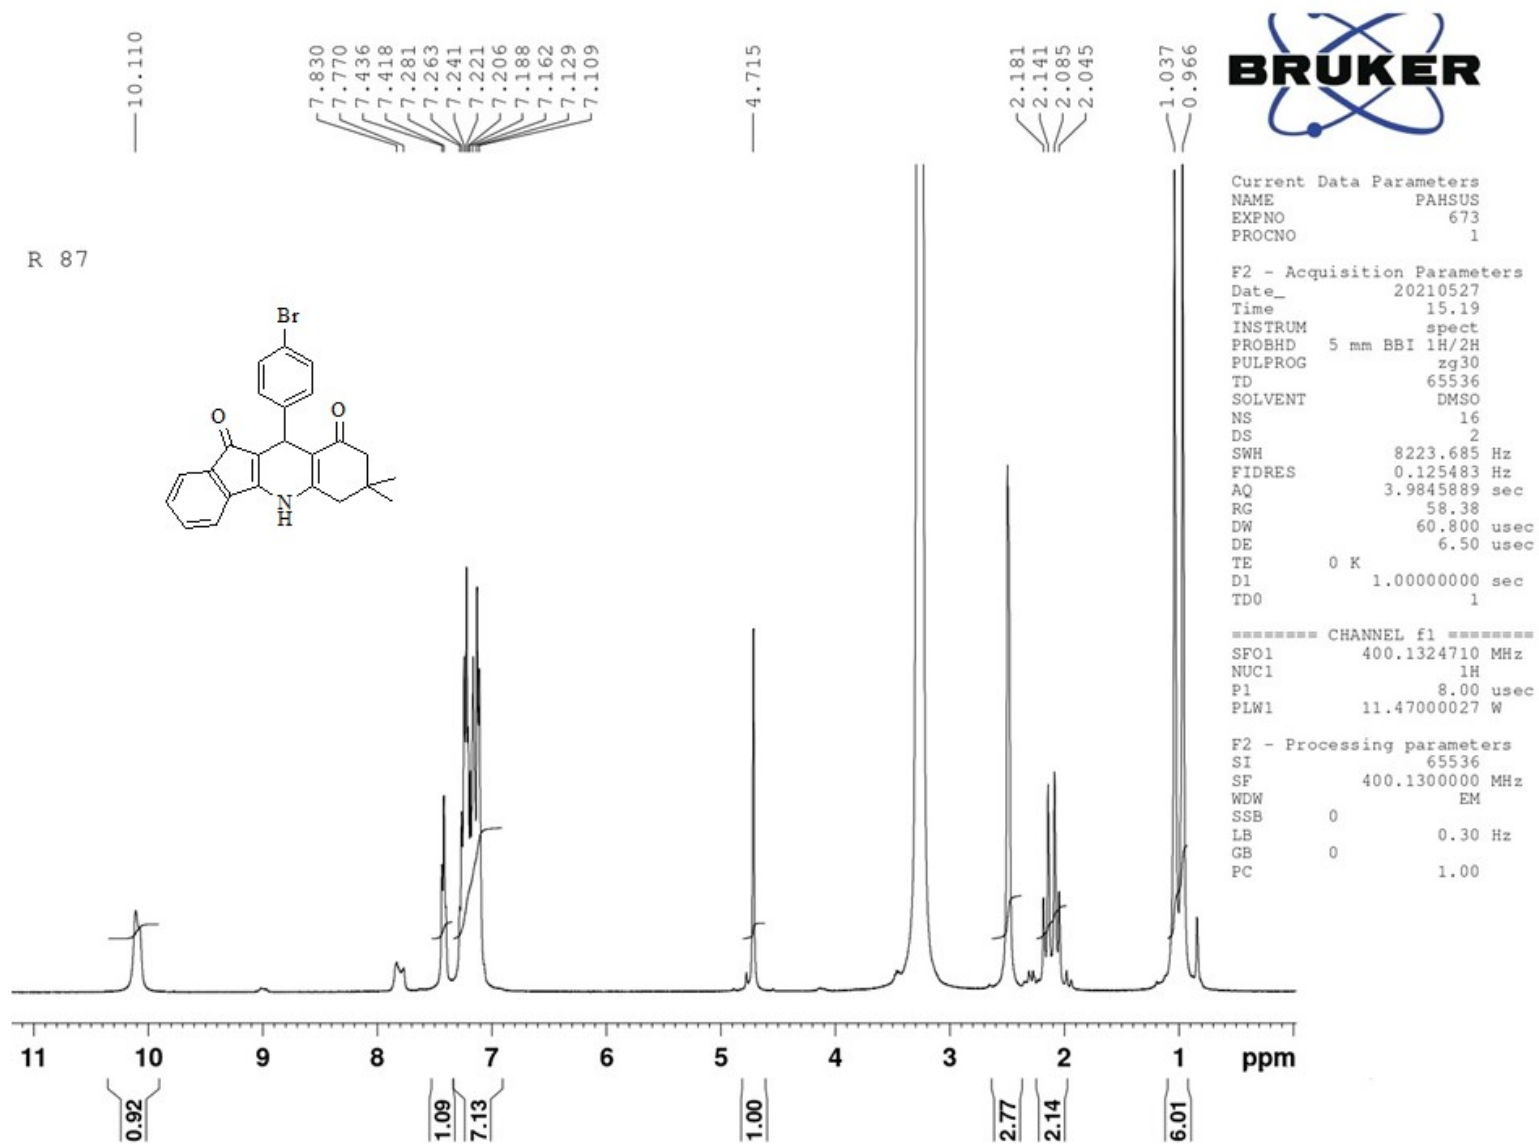

<sup>1</sup>H NMR (7b)

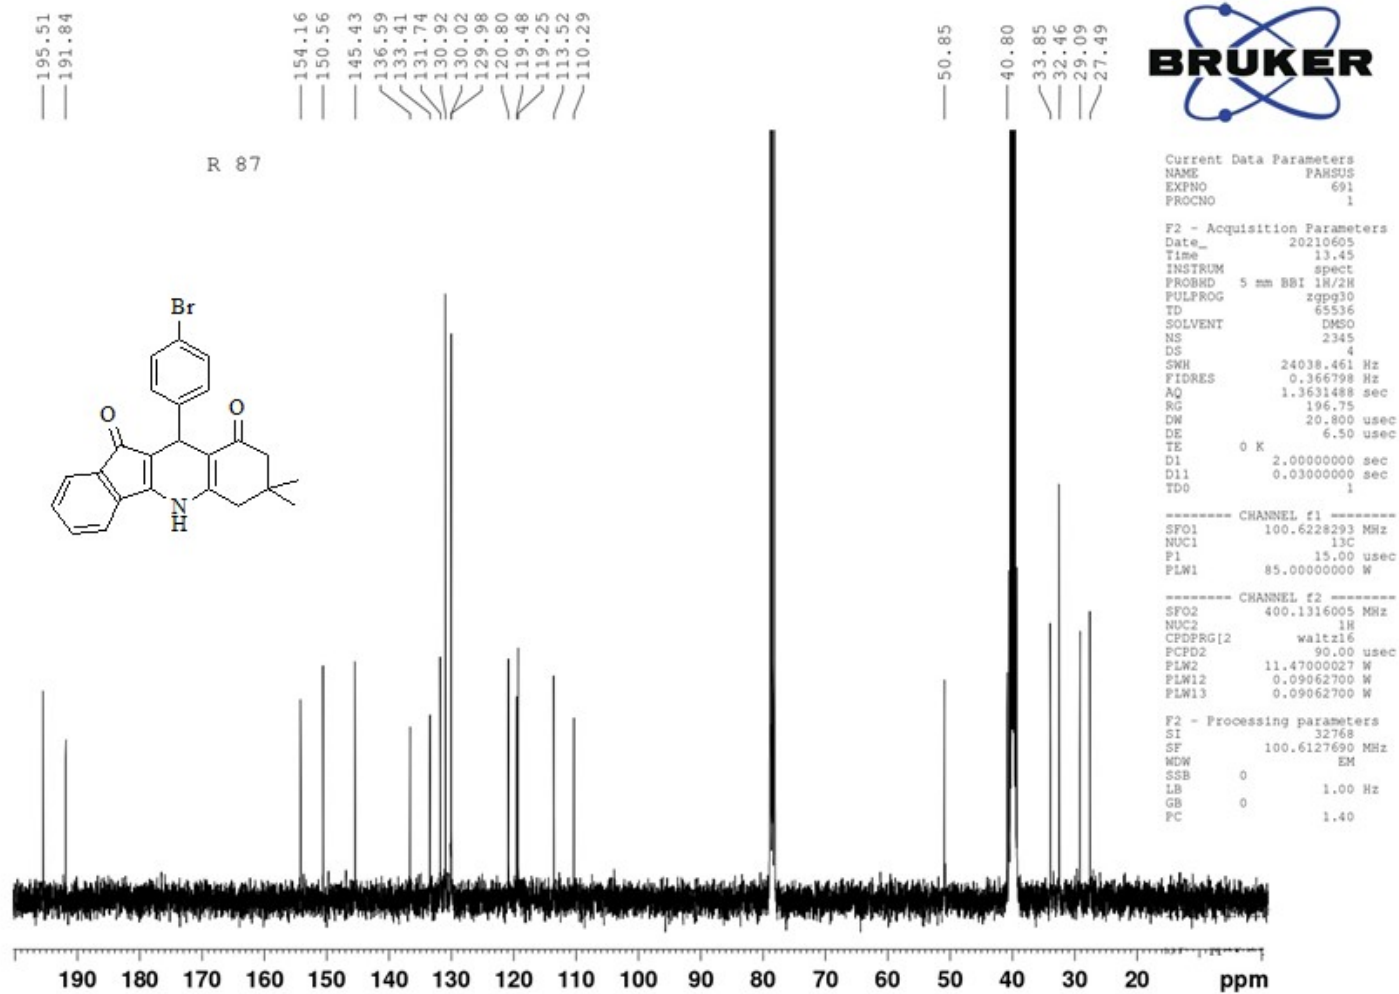

<sup>13</sup>C NMR (7b)

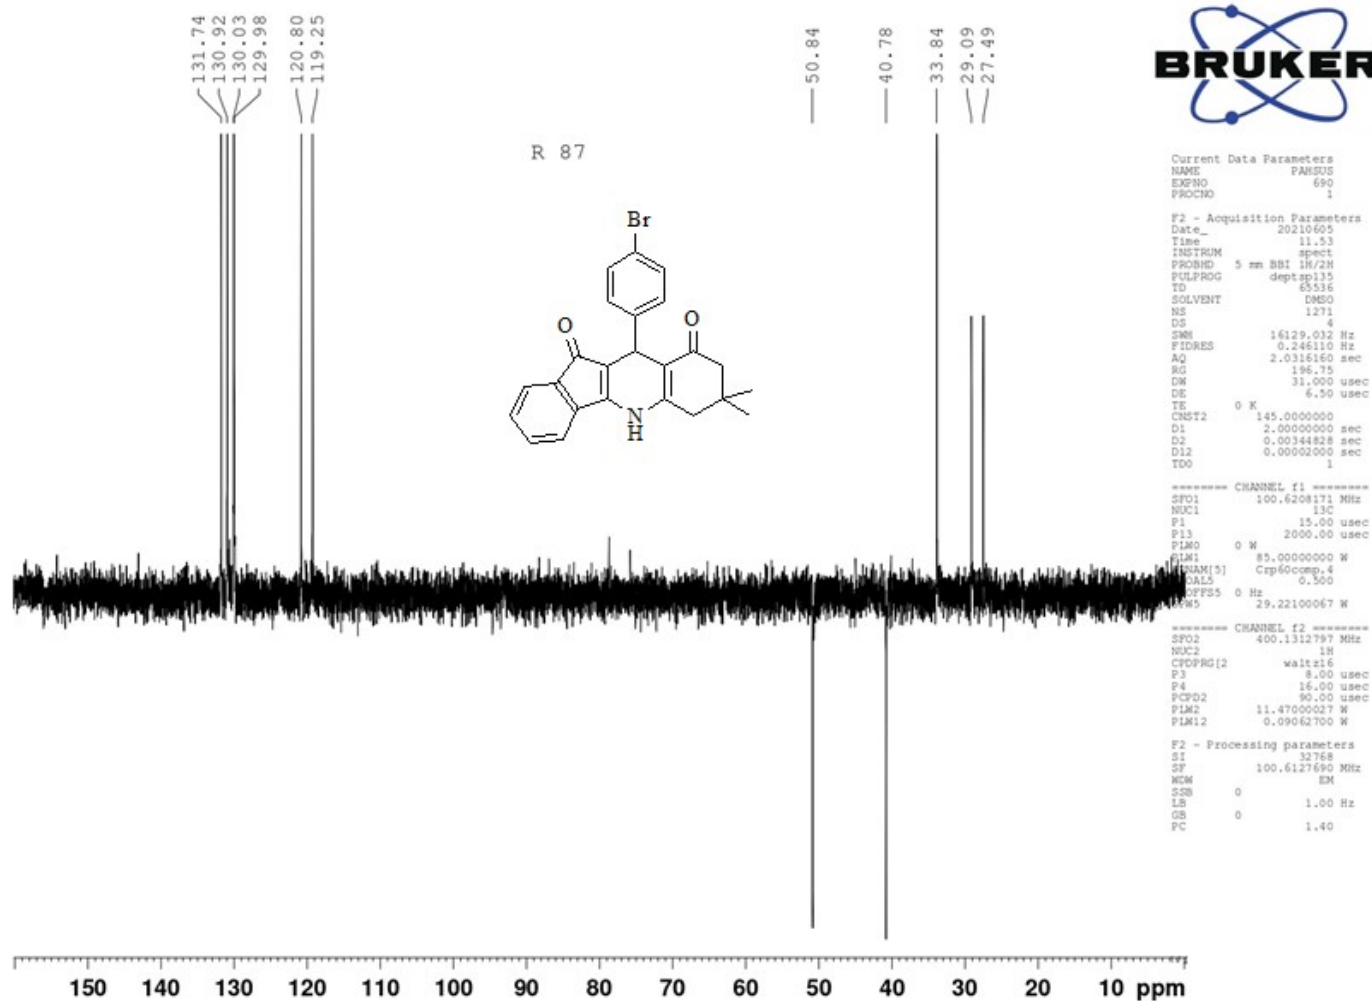

DEPT 13C NMR (7b)

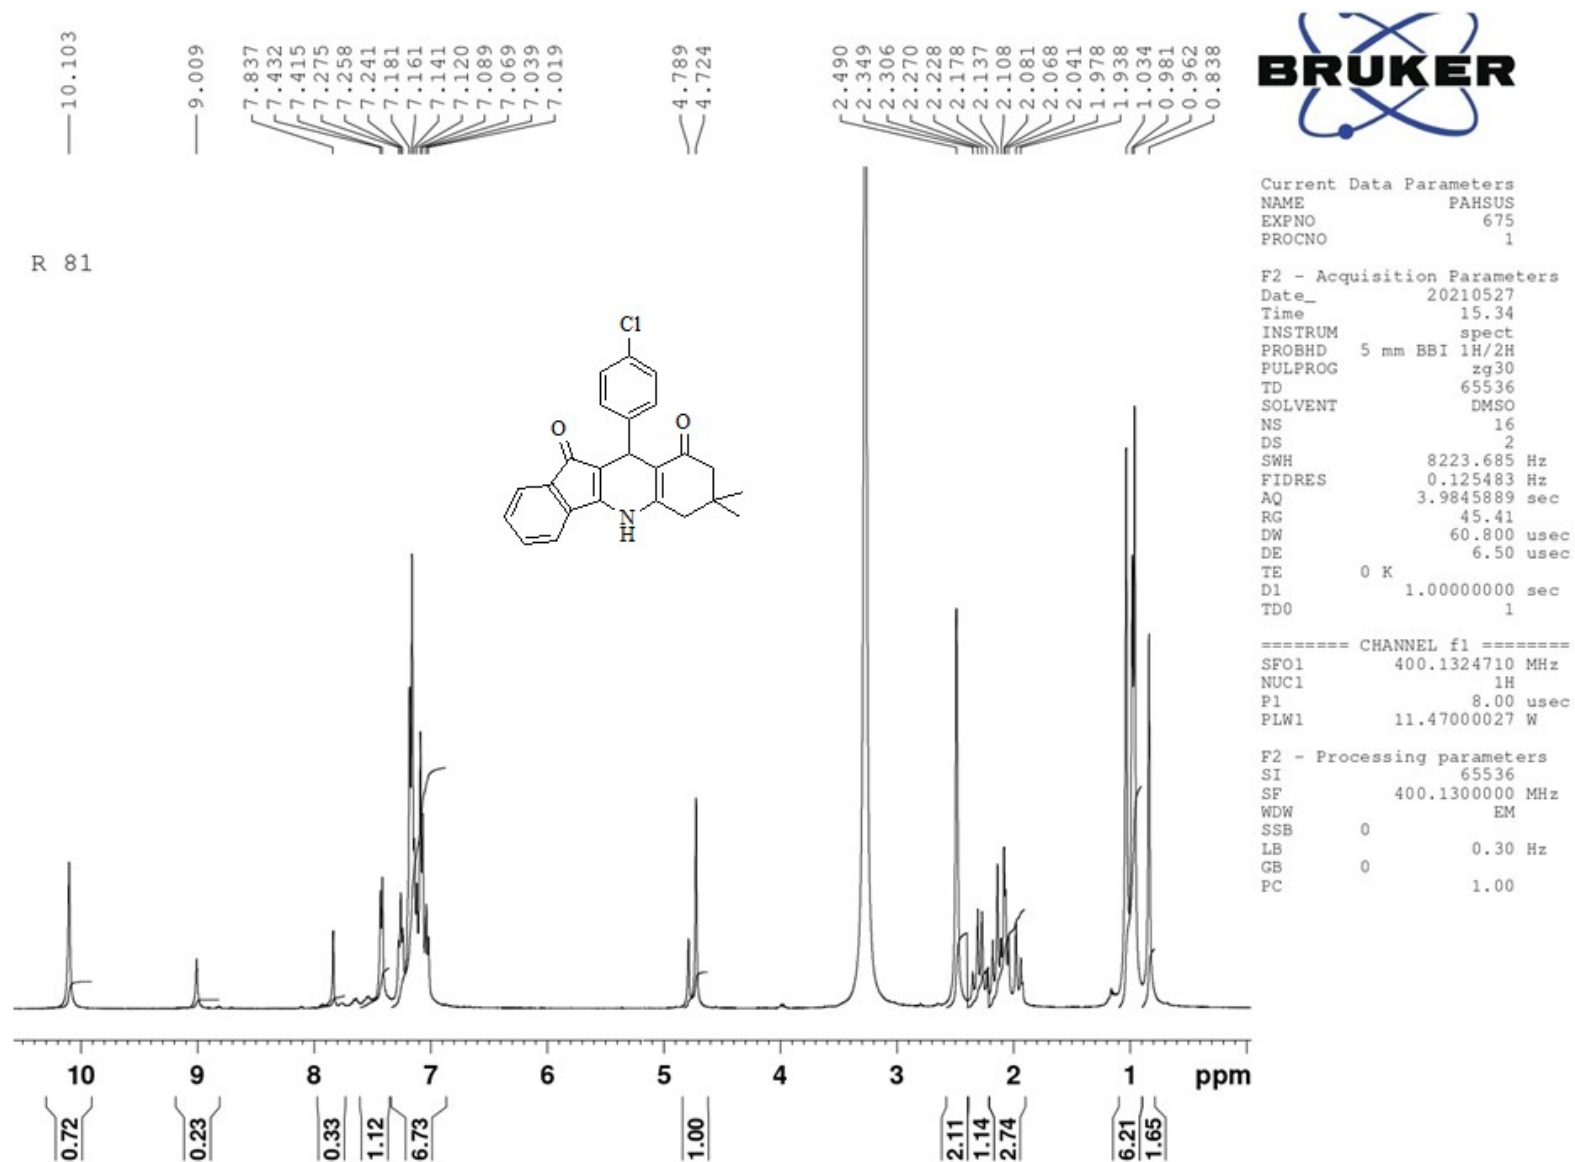

<sup>1</sup>H NMR (7c)

# Spectrum

Line#: 1 R.Time: 6.0 (Scan#: 1146)

MassPeaks: 543

RawMode: Averaged 6.0-6.0 (1145-1147) BasePeak: 278 (3700964)

BG Mode: Calc. from Peak Group 1 - Event 1

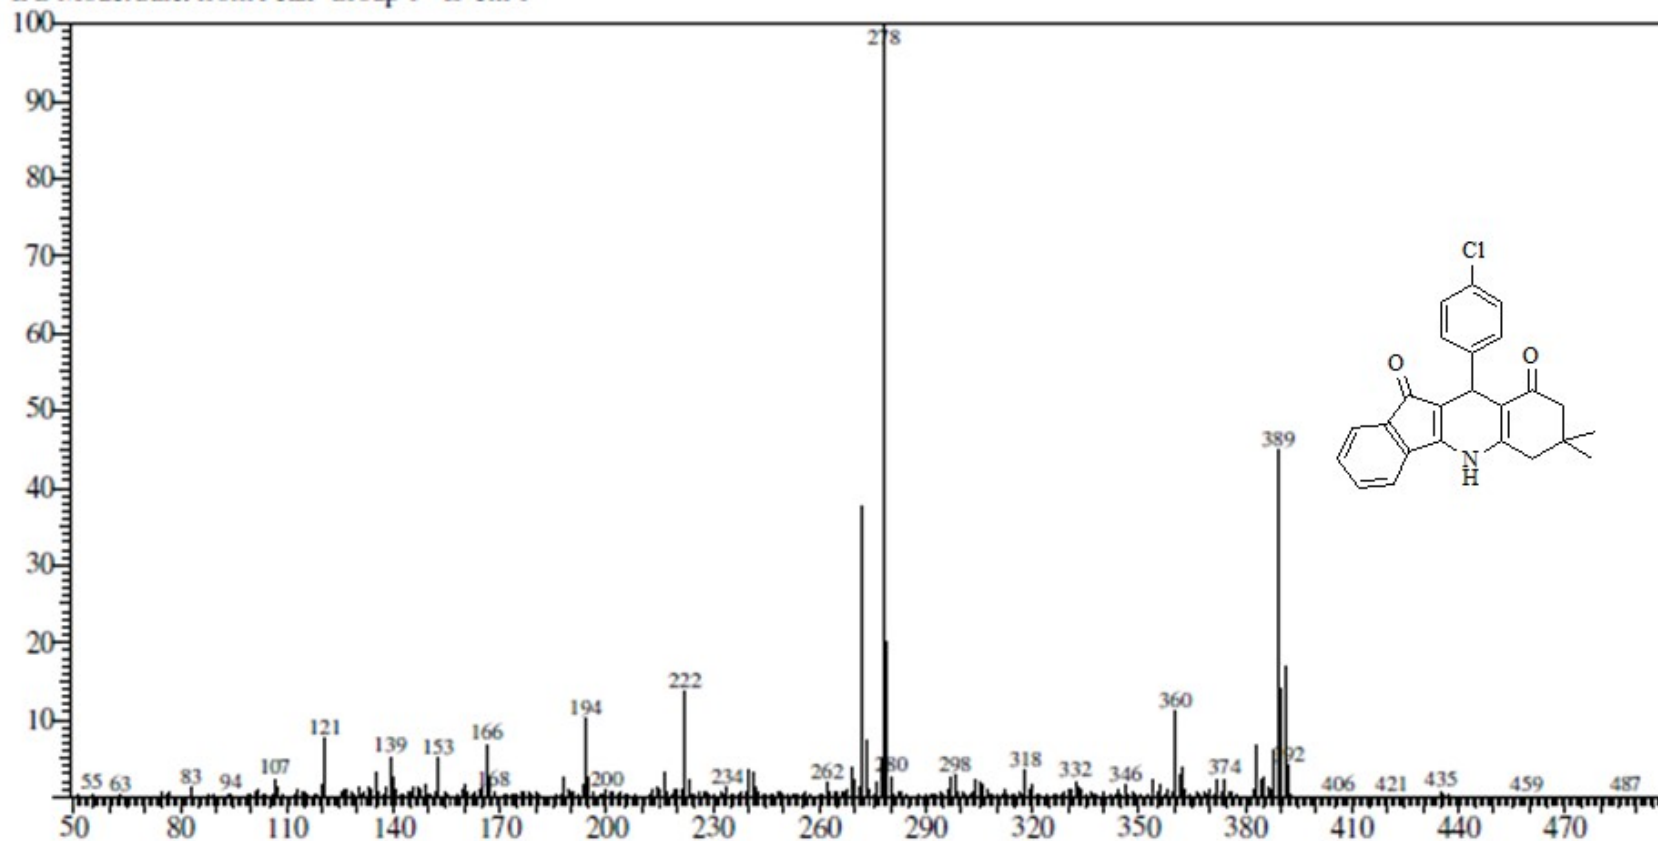

GC-MS MS (7c)

**Table S1** Comparison of the catalytic efficiency of Cu/zeolite-Y with previously reported catalysts for the synthesis of indenoquinoline derivatives via multi-component reactions

| Entry | Catalyst                                                                | Reactions condition                         | Time (Min) | Yield (%) | Literature |
|-------|-------------------------------------------------------------------------|---------------------------------------------|------------|-----------|------------|
| 1     | p-TSA                                                                   | Solvent free, Gridding/<br>R.T.             | 10         | 86        | 10         |
| 2     | H <sub>14</sub> [NaP <sub>5</sub> W<br><sub>30</sub> O <sub>110</sub> ] | Solvent free/ 120 °C, 0.03<br>g of catalyst | 150        | 70        | 12         |
| 3     | Melamine<br>trisulfonic<br>acid<br>(MTSA)                               | EtOH/reflux, 50 mg                          | 270        | 83        | 23         |
| 4     | CH <sub>3</sub> CO <sub>2</sub> H                                       | 120 °C/ MWI                                 | 4          | 91        | 39         |
| 5     | Tribromom<br>elamine<br>(TBM)                                           | EtOH/reflux, 10 mol% of<br>catalyst         | 60         | 92        | 44         |
| 6     | SA                                                                      | EtOH/reflux, 10 mol% of<br>catalyst         | 90         | 61        | 44         |
| 7     | ZrOCl <sub>2</sub>                                                      | EtOH/reflux, 10 mol% of<br>catalyst         | 120        | 52        | 44         |
| 8     | p-TSA                                                                   | EtOH/reflux, 10 mol% of                     | 90         | 73        | 44         |

|    |                                                         |                                      |     |    |           |
|----|---------------------------------------------------------|--------------------------------------|-----|----|-----------|
|    |                                                         | catalyst                             |     |    |           |
| 9  | In(OTf) <sub>3</sub>                                    | DMF/100 °C, 0.05 mmol<br>of catalyst | 120 | 76 | 42        |
| 10 | [bmim <sup>+</sup> ]<br>[BF <sub>4</sub> <sup>-</sup> ] | 10 mL/90 °C                          | 240 | 94 | 40        |
| 11 | Cu/Zeolite-<br>Y                                        | EtOH/reflux, 0.015 g of<br>catalyst  | 180 | 95 | This work |

---
